# Supplementary material for: A quantum-chemical insight into SOMO–HOMO conversion in phosphorus–boron cation radicals
Source: Royal Society of Chemistry journal article supplement (doi:10.1039/d4cp00098f), 2024-01-01
Supplement: d4cp00098f1.pdf [file d4cp00098f1.pdf]

## Supporting Information

### A Quantum-Chemical Insight into SOMO-HOMO Conversion in Phosphorus-Boron Cation Radicals

Li Zhang,<sup>a</sup> Hongbo Li,<sup>a</sup> Yanbin Zhu,<sup>a</sup> Shoufeng Zhang<sup>\*a</sup>

<sup>a</sup> School of Electronic Engineering, Guangxi University of Science and Technology, Liuzhou 545000, Guangxi, China

\*Corresponding authors.

E-mail: zhangli@gxust.edu.cn, zhangsf@gxust.edu.cn

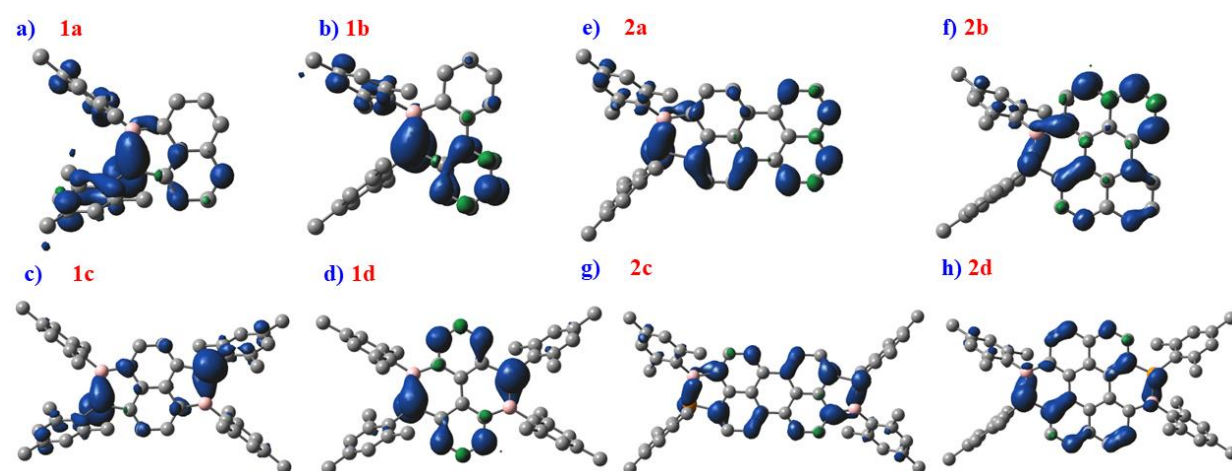

**Fig. S1** Spin density plots (isosurface value=0.02 a.u.) of the studied **1a-1d** and **2a-2d** radicals calculated in UB3LYP-D3/6-31G\* level.

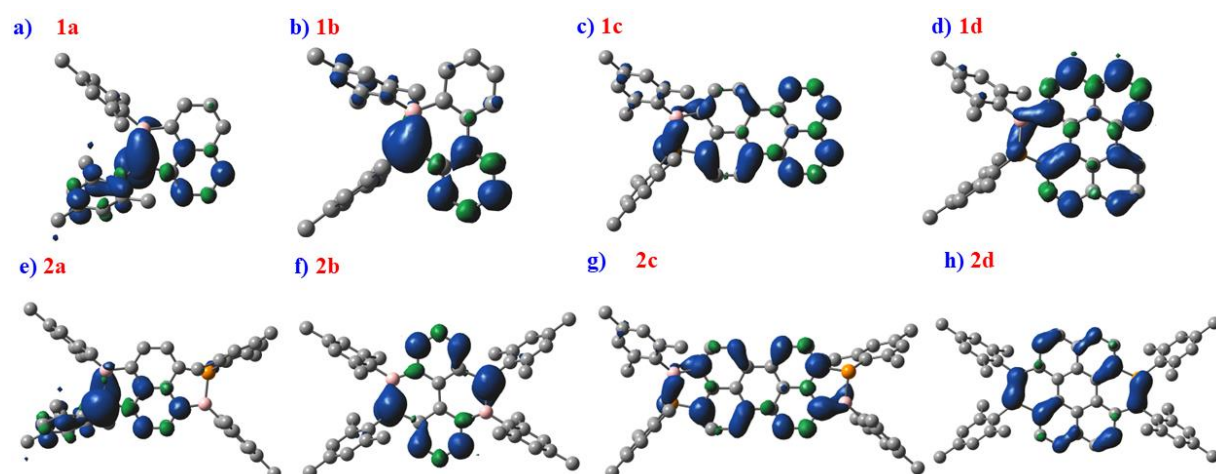

**Fig. S2** Spin density plots (isosurface value=0.02 a.u.) of the studied **1a-1d** and **2a-2d** radicals calculated at UωB97XD/6-31G\* level.

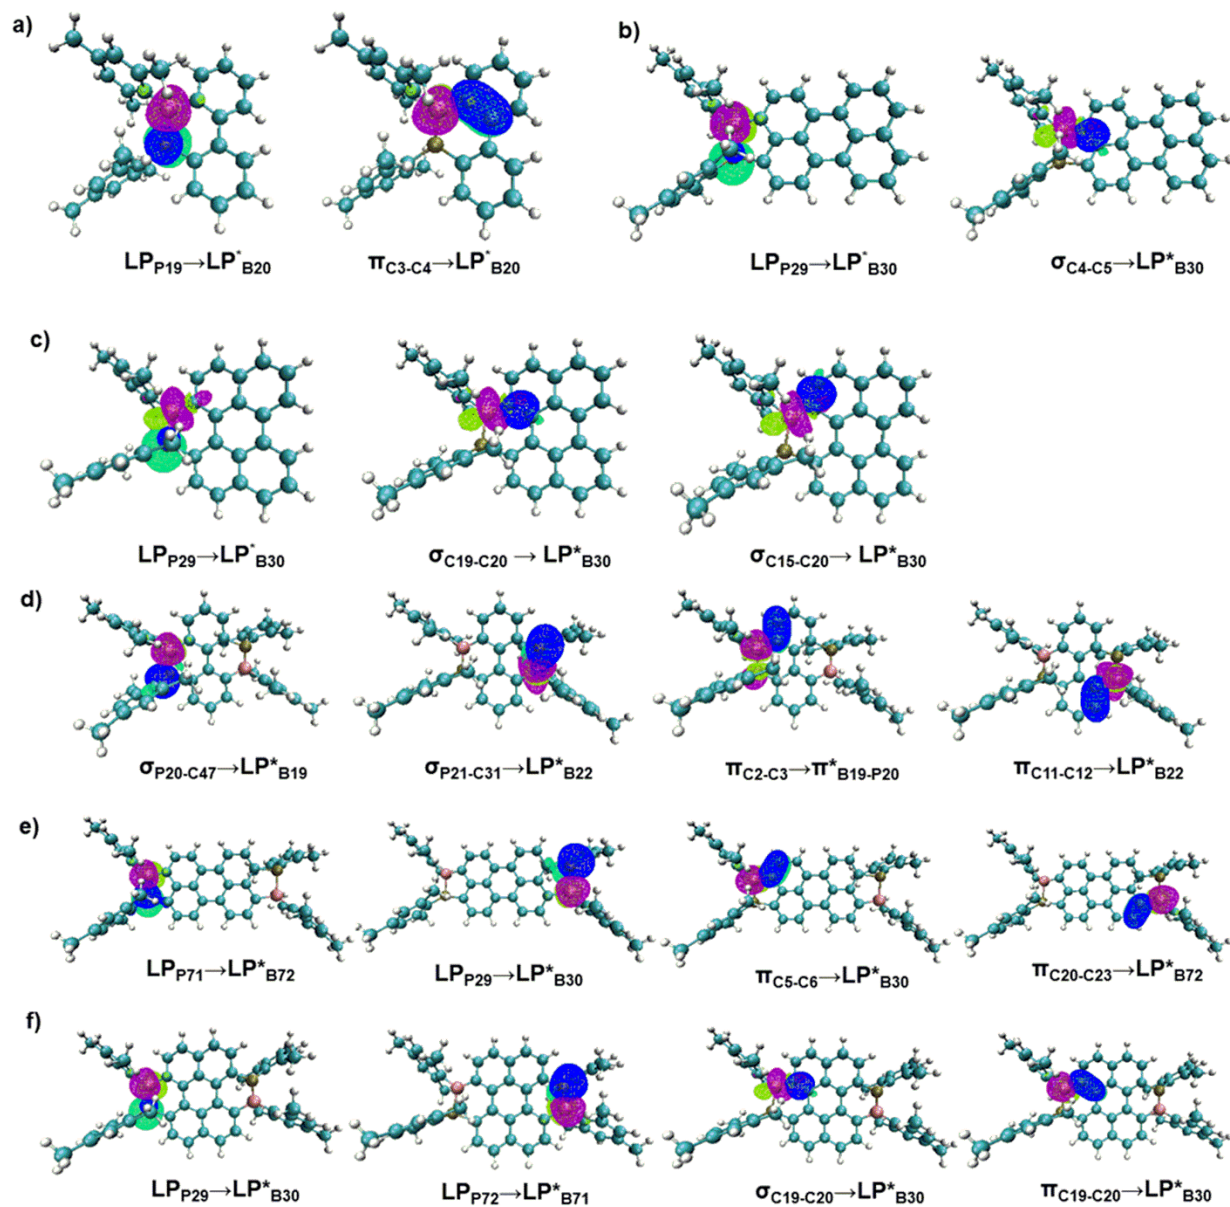

Fig. S3 NBO plots of principal donor-acceptor interactions in **1b** (a), **1c** (b), **1d** (c), **2b** (d), **2c** (e), and **2d** (f).

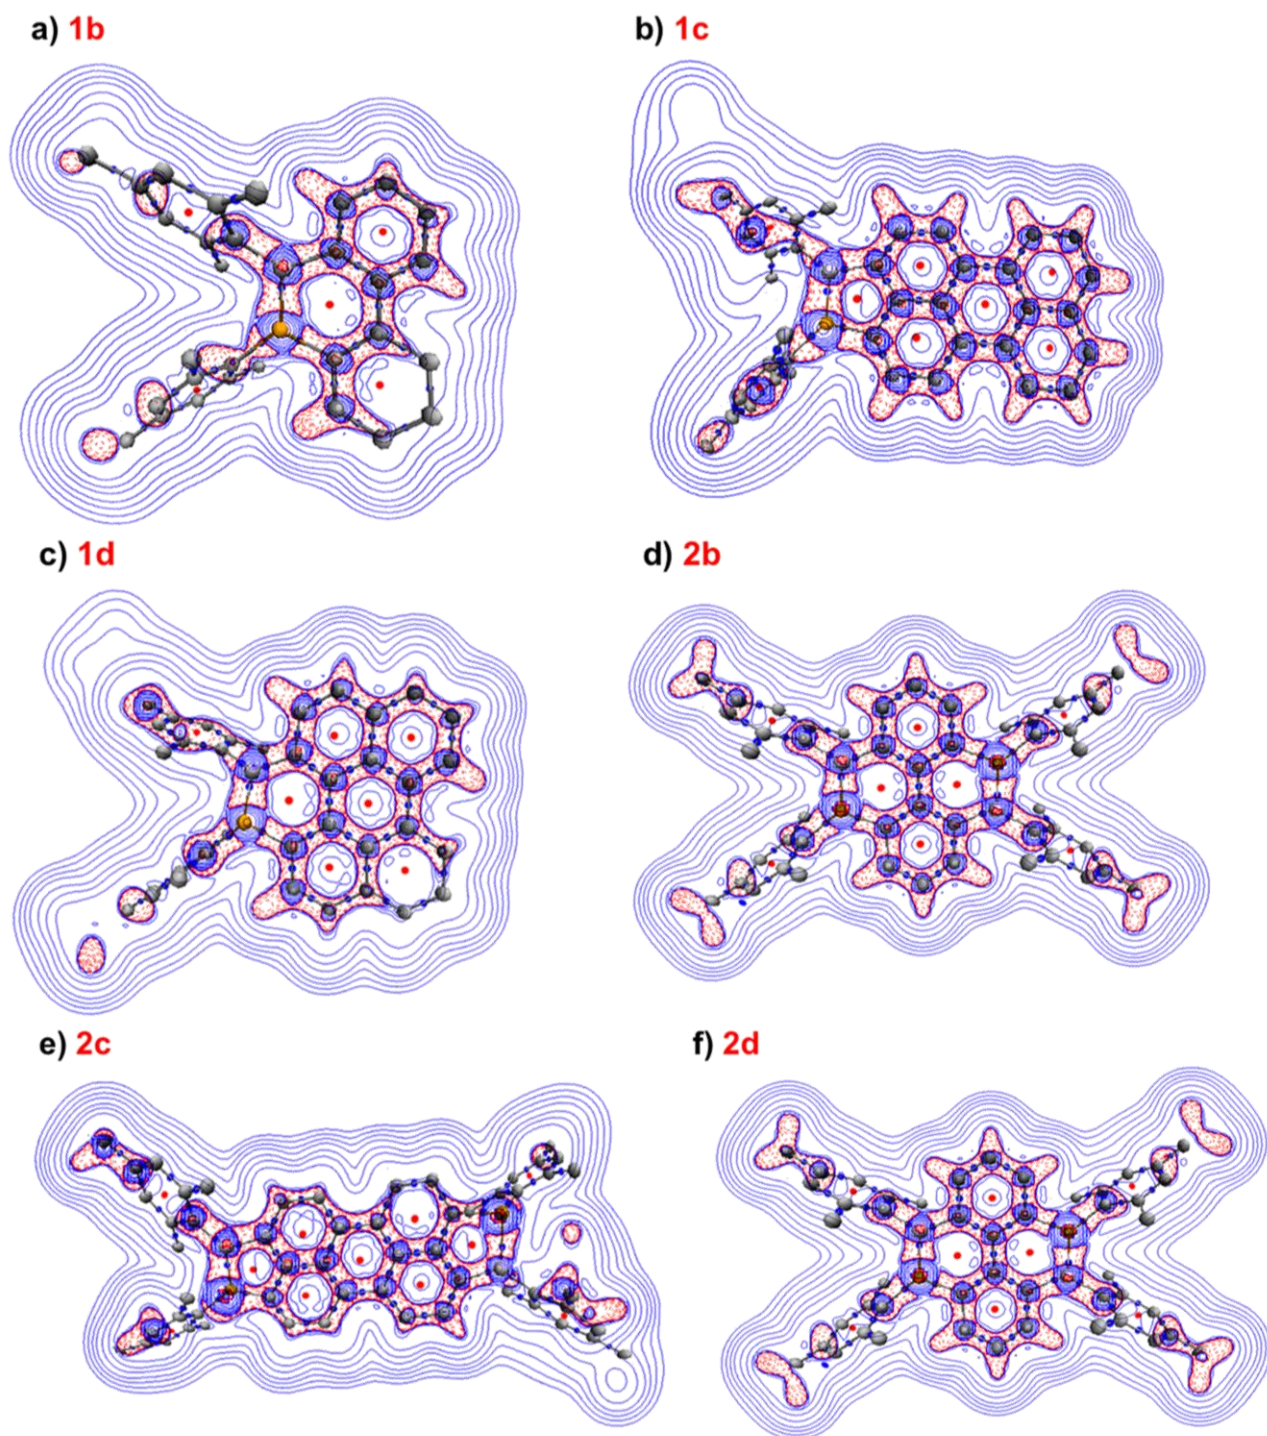

**Fig. S4** Plots of the Laplacian  $\nabla^2\rho(r)$  and critical points of studied compounds. Solid blue lines demonstrate areas of charge depletion ( $\nabla^2\rho(r) > 0$ ), red dashed lines show areas of charge concentration ( $\nabla^2\rho(r) < 0$ ). Blue dots are bond critical points, red dots are ring critical points.



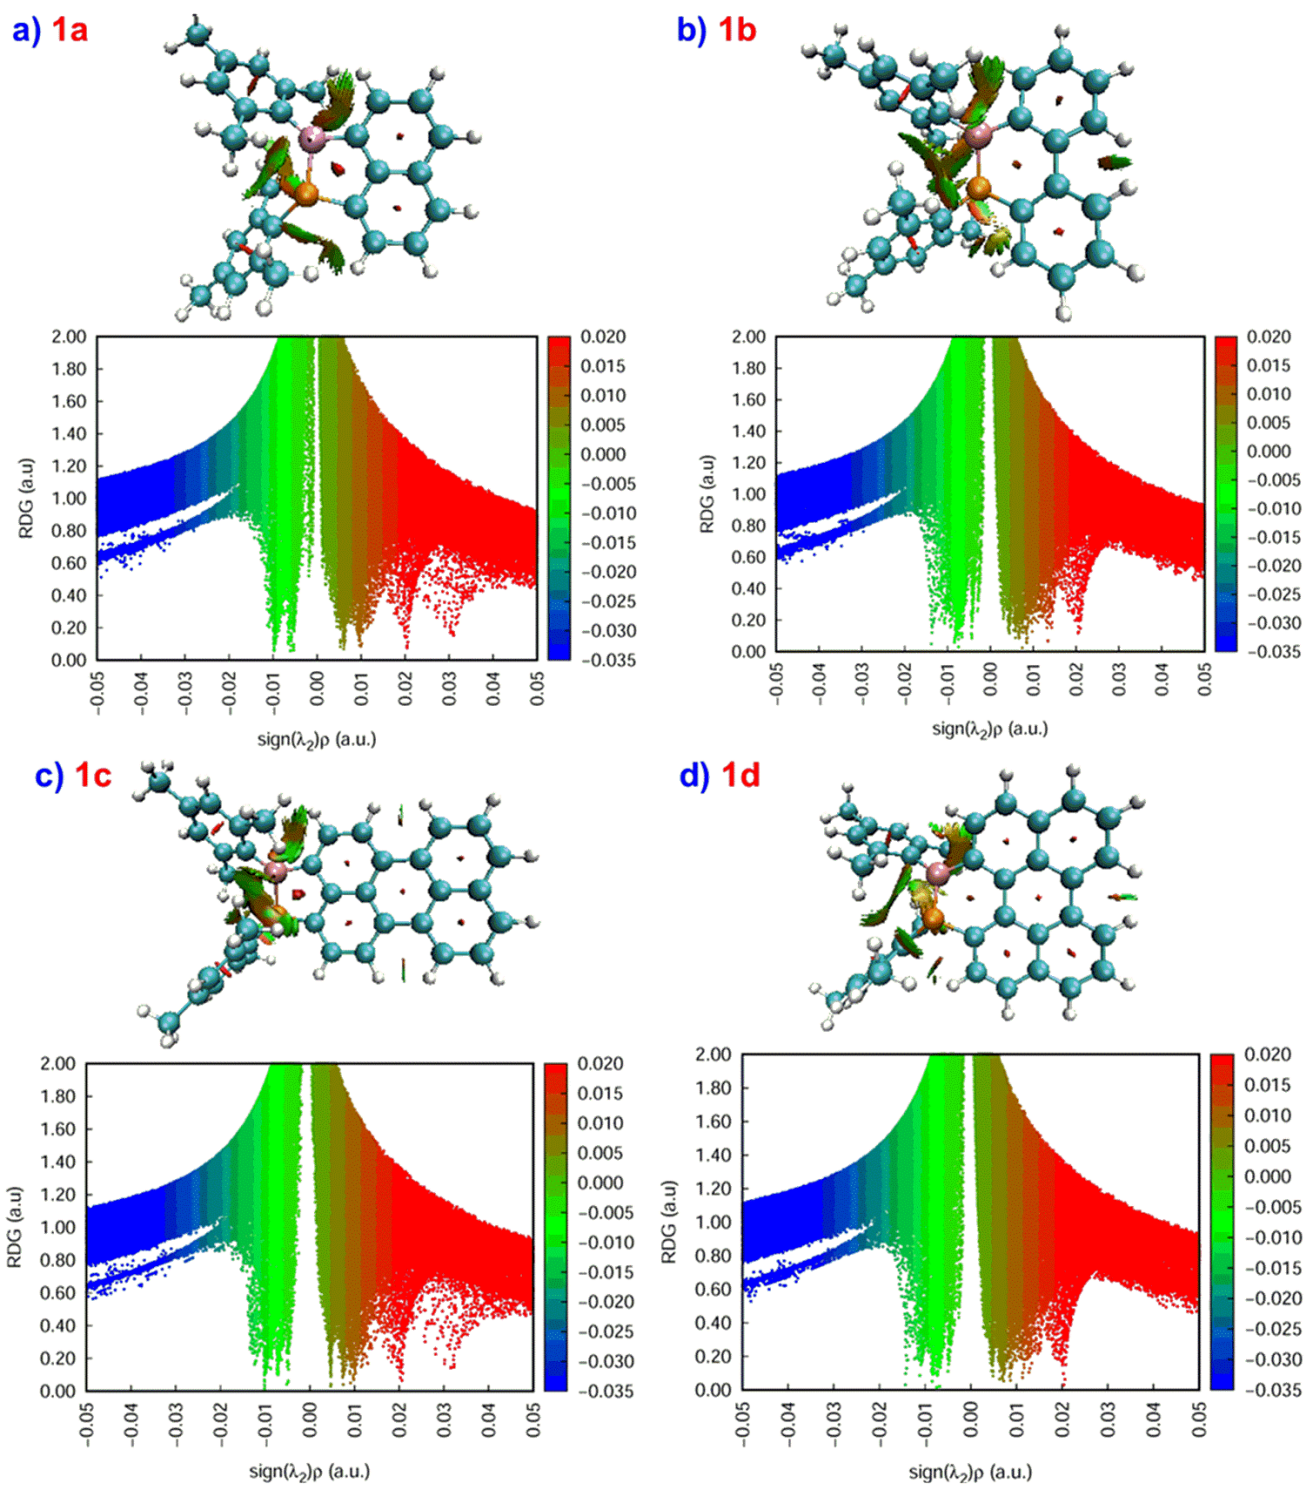

**Fig. S5** 3D color filled RDG isosurfaces and NCI-RDG 2D scatter maps of complexes **1a-1d**, respectively.

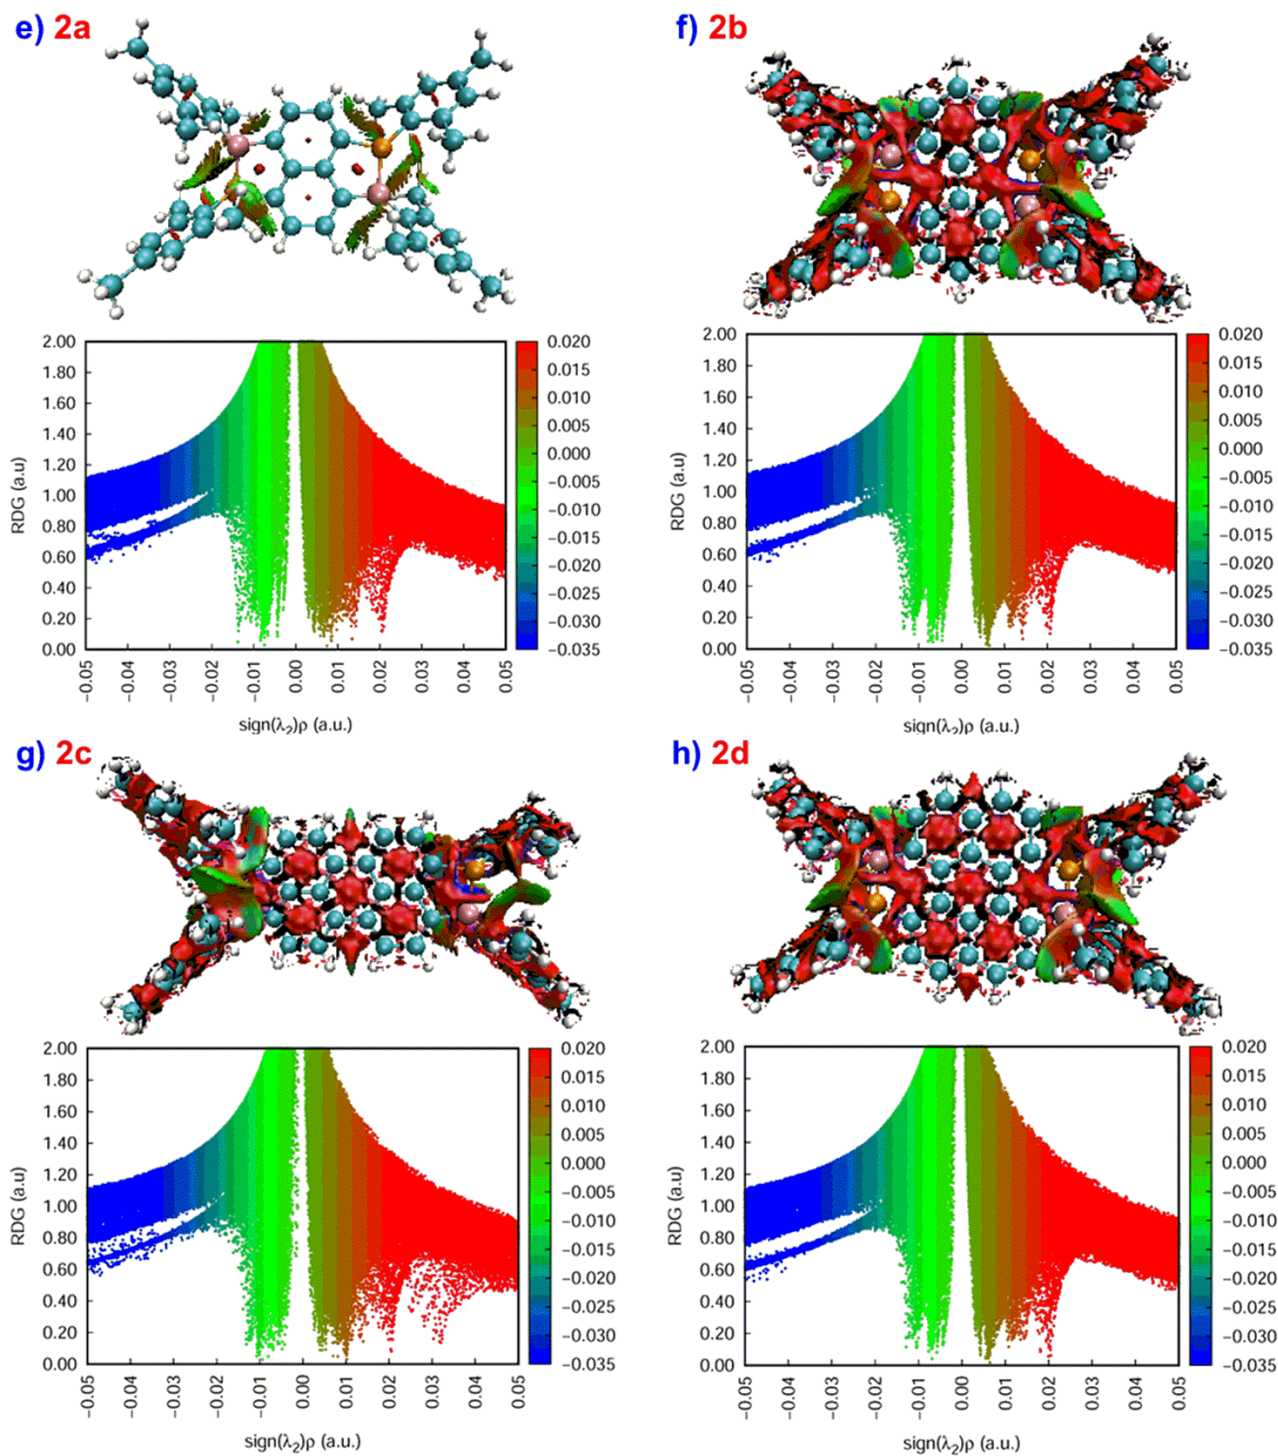

**Fig. S6** 3D color filled RDG isosurfaces and NCI-RDG 2D scatter maps of complexes **2a-2d**, respectively.

**Table S1** Calculated excited wavelengths ( $\lambda$ ), oscillator strengths ( $f$ ) and the transition nature of the selected transitions of studied compounds at TD-DFT//UM06-2X-D3/6-31G\* level.

| Compounds | Excited state  | Wavelength/nm | $f$  | Dominant Excitations                          |     |
|-----------|----------------|---------------|------|-----------------------------------------------|-----|
| <b>1a</b> | D <sub>1</sub> | 739.3         | 0.02 | HOMO( $\beta$ ) $\rightarrow$ SOMO( $\beta$ ) | 79% |

|           |                 |        |      |                                                   |     |
|-----------|-----------------|--------|------|---------------------------------------------------|-----|
| <b>1b</b> | D <sub>2</sub>  | 601.9  | 0.06 | HOMO-2( $\beta$ ) $\rightarrow$ SOMO( $\beta$ )   | 63% |
|           | D <sub>1</sub>  | 758.0  | 0.02 | HOMO( $\beta$ ) $\rightarrow$ SOMO( $\beta$ )     | 67% |
| <b>1c</b> |                 |        |      | HOMO-2( $\beta$ ) $\rightarrow$ SOMO( $\beta$ )   | 21% |
|           | D <sub>2</sub>  | 670.0  | 0.03 | HOMO-2( $\beta$ ) $\rightarrow$ SOMO( $\beta$ )   | 66% |
|           |                 |        |      | HOMO( $\beta$ ) $\rightarrow$ SOMO( $\beta$ )     | 22% |
|           | D <sub>4</sub>  | 535.6  | 0.06 | HOMO-4( $\beta$ ) $\rightarrow$ SOMO( $\beta$ )   | 87% |
| <b>1d</b> | D <sub>1</sub>  | 1254.9 | 0.20 | HOMO( $\beta$ ) $\rightarrow$ SOMO( $\beta$ )     | 93% |
|           | D <sub>3</sub>  | 629.2  | 0.30 | HOMO-1( $\beta$ ) $\rightarrow$ SOMO( $\beta$ )   | 47% |
|           |                 |        |      | SOMO( $\alpha$ ) $\rightarrow$ LUMO( $\alpha$ )   | 34% |
| <b>2a</b> | D <sub>8</sub>  | 497.2  | 0.37 | HOMO-6( $\beta$ ) $\rightarrow$ SOMO( $\beta$ )   | 33% |
|           |                 |        |      | SOMO( $\alpha$ ) $\rightarrow$ LUMO( $\alpha$ )   | 12% |
|           | D <sub>1</sub>  | 1534.4 | 0.07 | HOMO( $\beta$ ) $\rightarrow$ SOMO( $\beta$ )     | 92% |
|           | D <sub>2</sub>  | 674.8  | 0.07 | HOMO-1( $\beta$ ) $\rightarrow$ SOMO( $\beta$ )   | 38% |
| <b>2b</b> |                 |        |      | HOMO-2( $\beta$ ) $\rightarrow$ SOMO( $\beta$ )   | 30% |
|           | D <sub>3</sub>  | 601.9  | 0.07 | HOMO-5( $\beta$ ) $\rightarrow$ SOMO( $\beta$ )   | 73% |
|           | D <sub>8</sub>  | 487.4  | 0.23 | SOMO( $\alpha$ ) $\rightarrow$ LUMO( $\alpha$ )   | 56% |
|           | D <sub>1</sub>  | 850.0  | 0.03 | HOMO( $\beta$ ) $\rightarrow$ SOMO( $\beta$ )     | 78% |
|           | D <sub>2</sub>  | 675.4  | 0.05 | HOMO-3( $\beta$ ) $\rightarrow$ SOMO( $\beta$ )   | 68% |
|           | D <sub>5</sub>  | 511.3  | 0.06 | HOMO( $\alpha$ ) $\rightarrow$ LUMO( $\alpha$ )   | 36% |
| <b>2c</b> |                 |        |      | HOMO-7( $\beta$ ) $\rightarrow$ SOMO( $\beta$ )   | 14% |
|           | D <sub>11</sub> | 434.3  | 0.23 | HOMO( $\beta$ ) $\rightarrow$ LUMO( $\beta$ )     | 34% |
|           |                 |        |      | HOMO-1( $\alpha$ ) $\rightarrow$ LUMO( $\alpha$ ) | 24% |
|           | D <sub>1</sub>  | 1664.9 | 0.23 | HOMO( $\beta$ ) $\rightarrow$ SOMO( $\beta$ )     | 99% |
| <b>2d</b> | D <sub>7</sub>  | 510.1  | 0.03 | HOMO-10( $\beta$ ) $\rightarrow$ SOMO( $\beta$ )  | 41% |
|           |                 |        |      | HOMO-9( $\beta$ ) $\rightarrow$ SOMO( $\beta$ )   | 40% |
|           | D <sub>12</sub> | 396.6  | 0.17 | HOMO( $\alpha$ ) $\rightarrow$ LUMO( $\alpha$ )   | 70% |
|           | D <sub>1</sub>  | 1483.6 | 0.24 | HOMO( $\beta$ ) $\rightarrow$ SOMO( $\beta$ )     | 88% |
|           | D <sub>3</sub>  | 706.7  | 0.21 | HOMO( $\alpha$ ) $\rightarrow$ LUMO( $\alpha$ )   | 73% |
| <b>2e</b> | D <sub>4</sub>  | 658.3  | 0.39 | HOMO-2( $\beta$ ) $\rightarrow$ SOMO( $\beta$ )   | 50% |
|           | D <sub>12</sub> | 501.4  | 0.17 | SOMO( $\alpha$ ) $\rightarrow$ LUMO( $\alpha$ )   | 19% |
|           |                 |        |      | HOMO-10( $\beta$ ) $\rightarrow$ SOMO( $\beta$ )  | 16% |
|           |                 |        |      | HOMO-12( $\beta$ ) $\rightarrow$ SOMO( $\beta$ )  | 16% |
|           | D <sub>2</sub>  | 1320.8 | 0.36 | HOMO( $\beta$ ) $\rightarrow$ SOMO( $\beta$ )     | 95% |
| <b>2f</b> | D <sub>5</sub>  | 564.3  | 0.09 | HOMO-10( $\beta$ ) $\rightarrow$ SOMO( $\beta$ )  | 77% |
|           | D <sub>9</sub>  | 491.9  | 0.06 | HOMO-11( $\beta$ ) $\rightarrow$ SOMO( $\beta$ )  | 58% |
|           | D <sub>13</sub> | 445.8  | 0.27 | HOMO( $\alpha$ ) $\rightarrow$ LUMO( $\alpha$ )   | 74% |

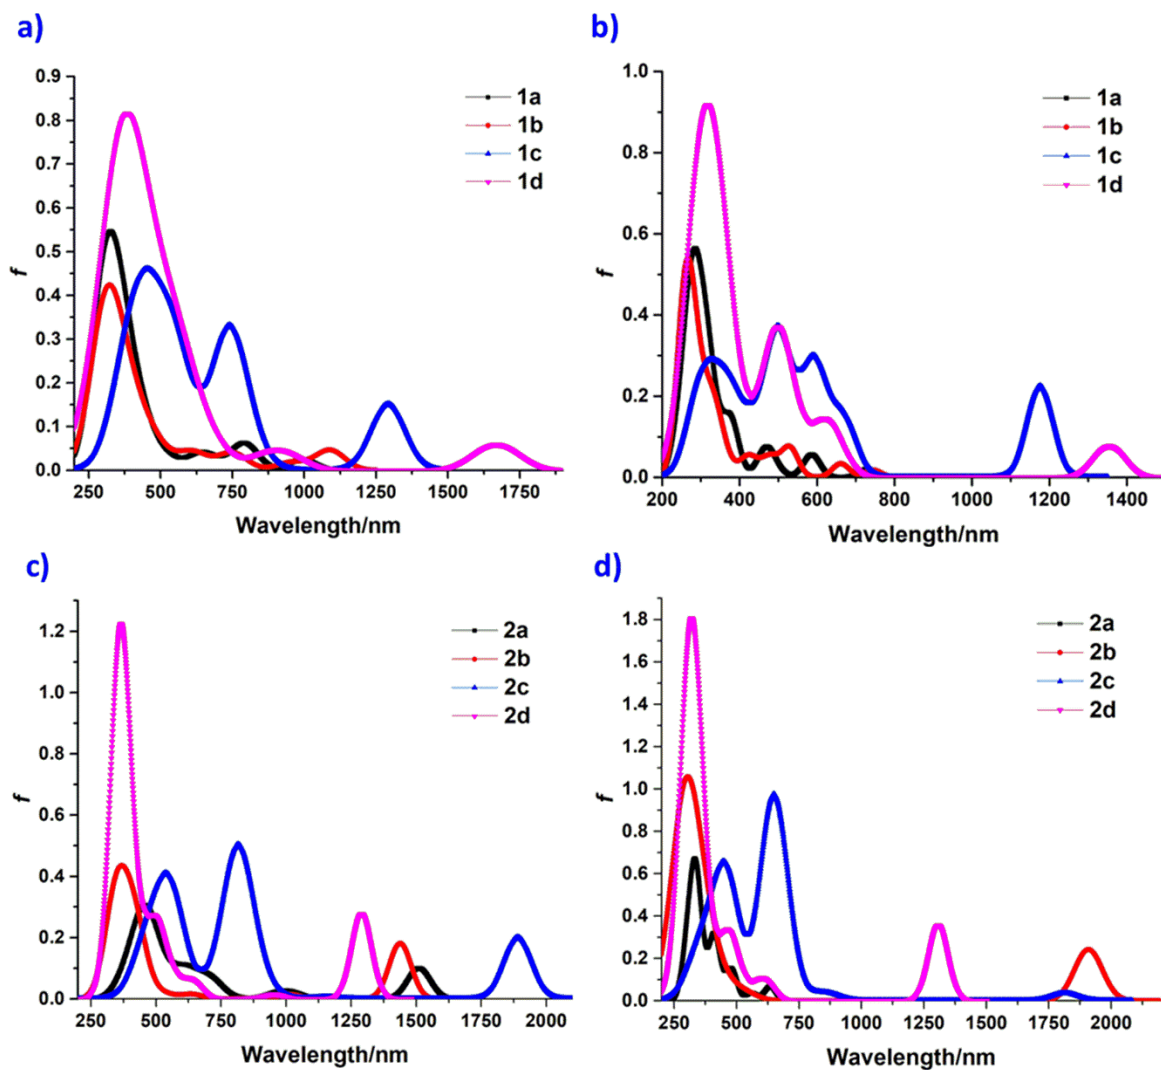

**Fig. S7** Calculated UV-vis absorption spectra of the studied compounds performed at UB3LYP-D3/6-31G(d)+SMD (a, b) and  $\omega$ B97XD/6-31G(d)+SMD (c, d), respectively.



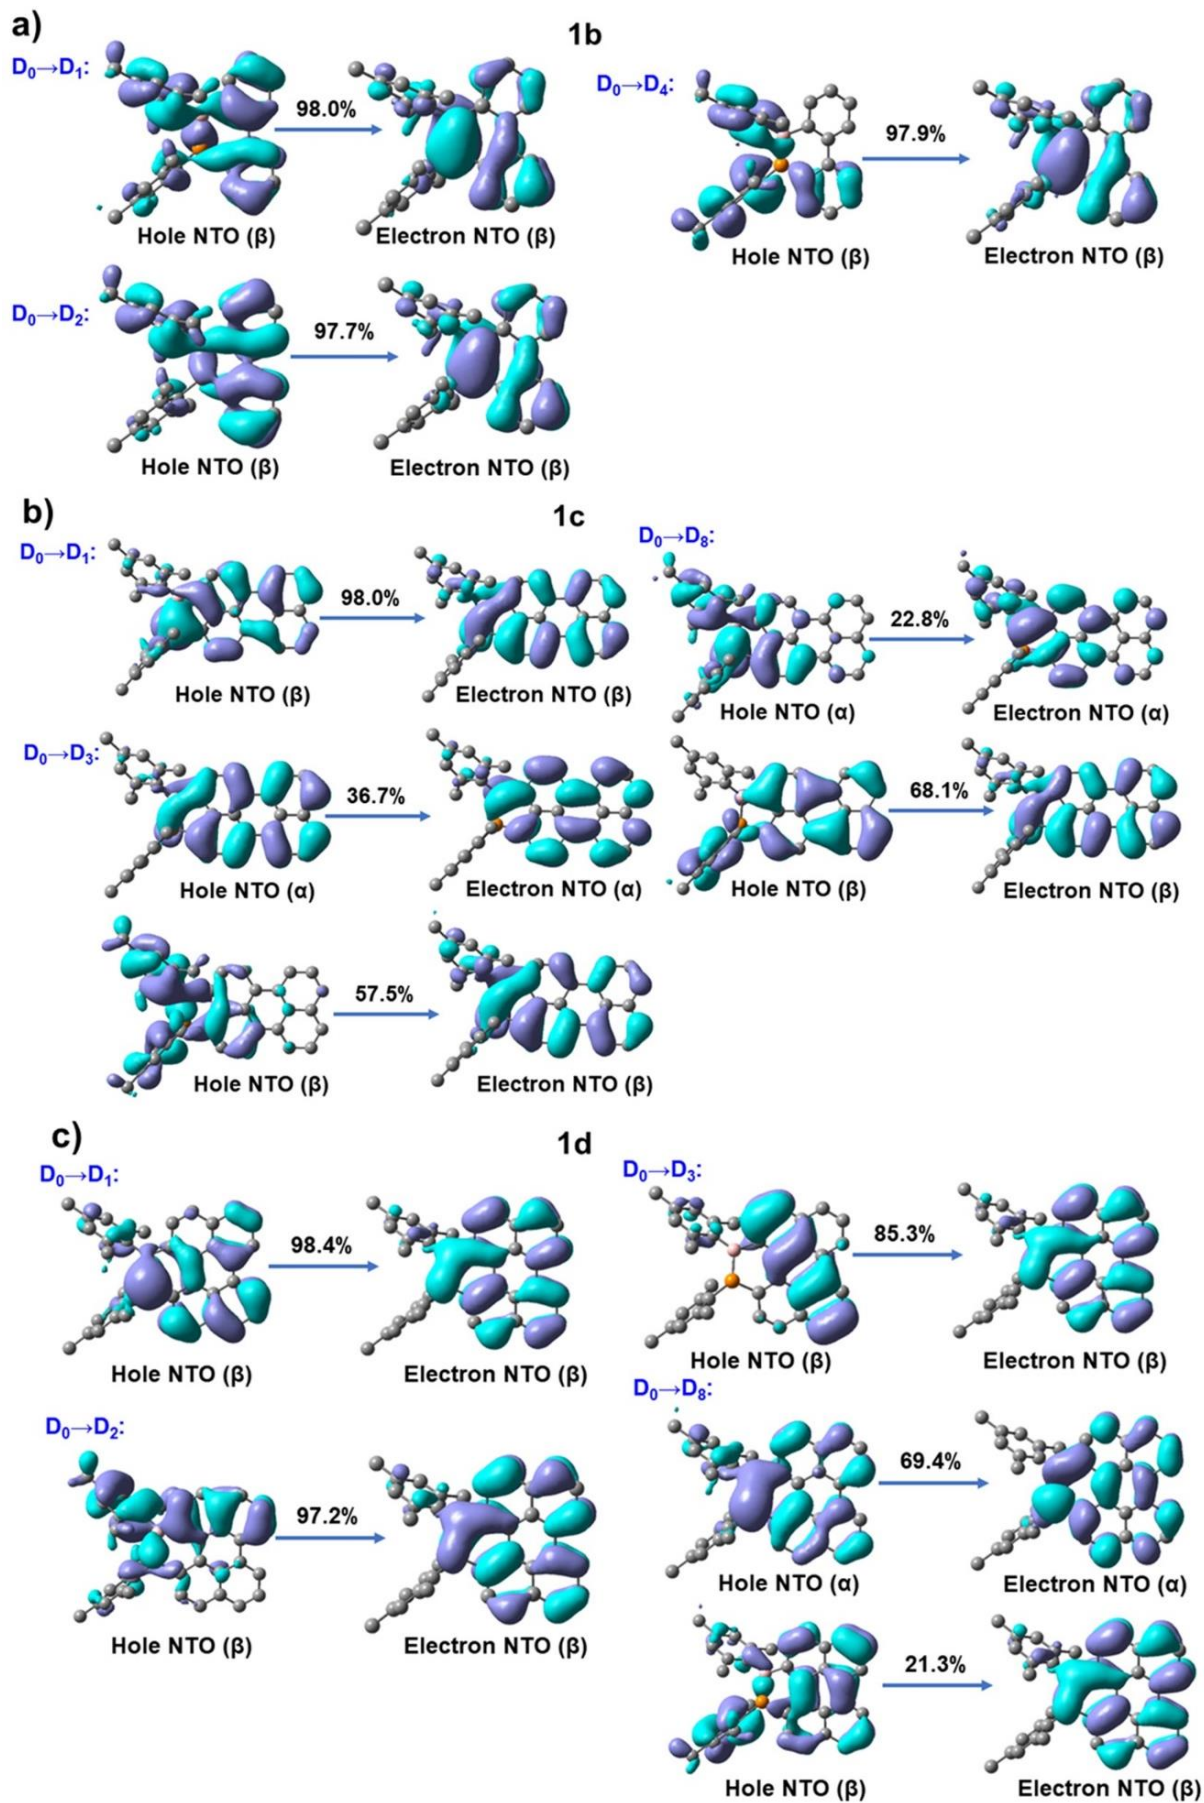



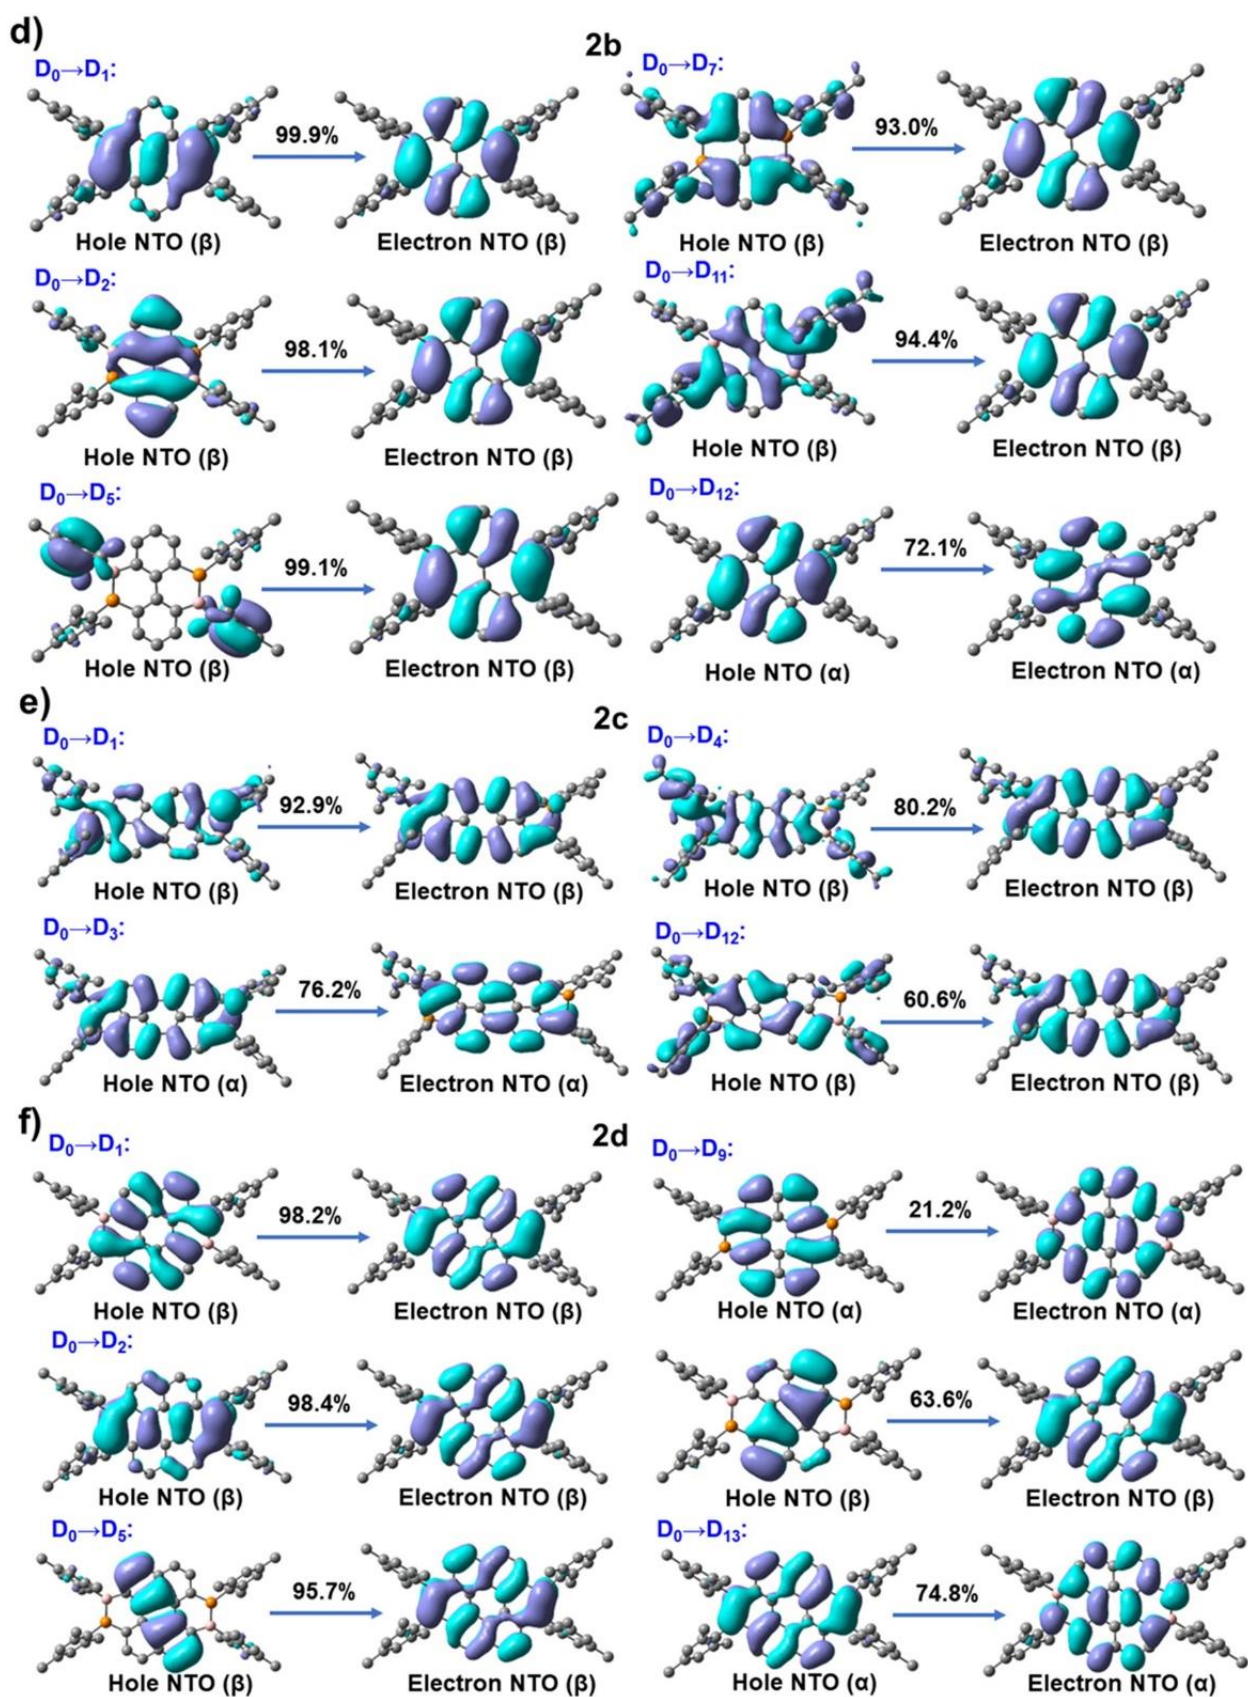

Fig. S8 Natural transition orbitals (NTOs) of the studied radicals.

1a

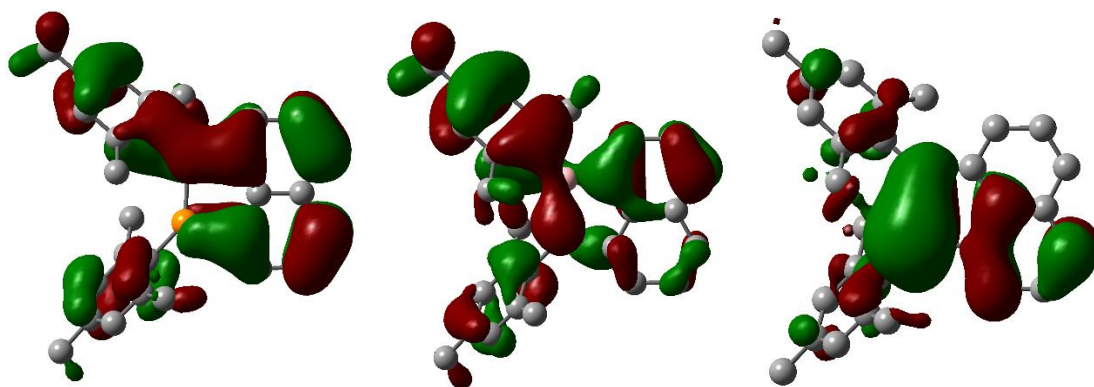

HOMO-2( $\beta$ )

HOMO( $\beta$ )

SOMO( $\beta$ )

**1b**

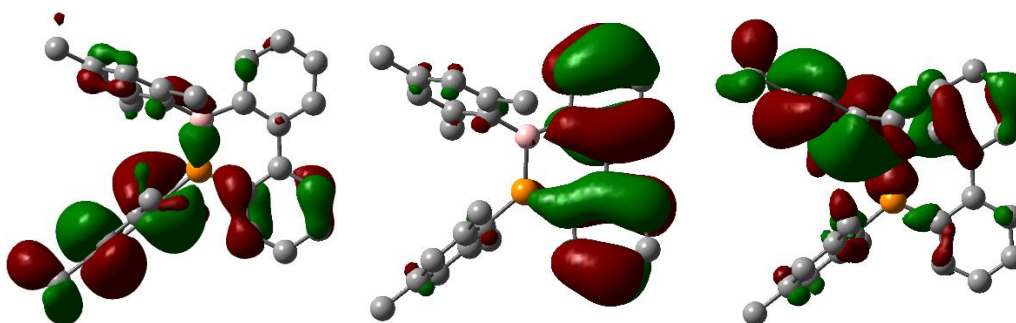

HOMO-4( $\beta$ )

HOMO-2( $\beta$ )

HOMO( $\beta$ )

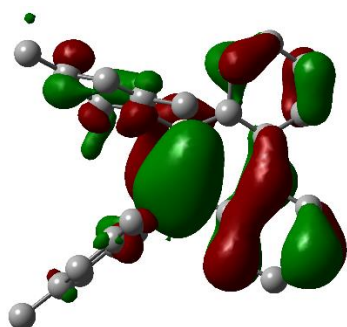

SOMO( $\beta$ )

**1c**

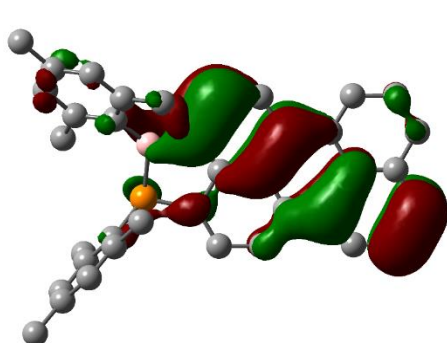

HOMO-6( $\beta$ )

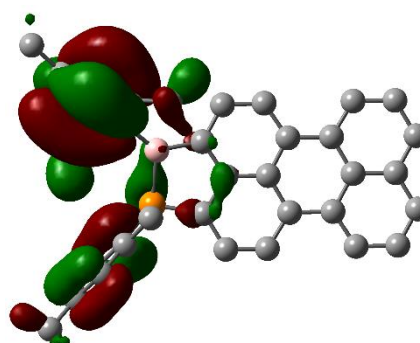

HOMO-1( $\beta$ )

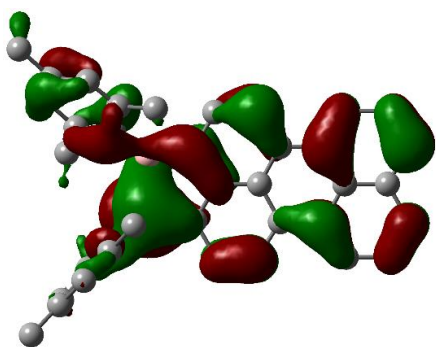

HOMO( $\beta$ )

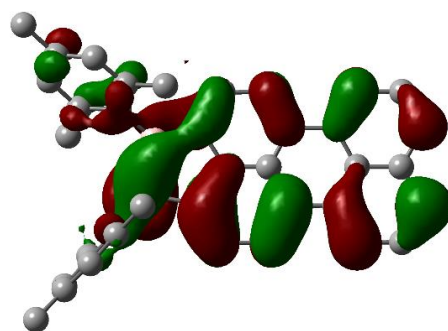

SOMO( $\beta$ )

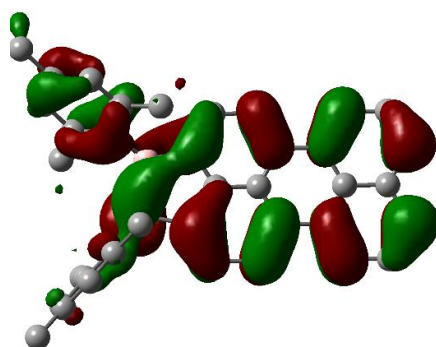

SOMO( $\alpha$ )

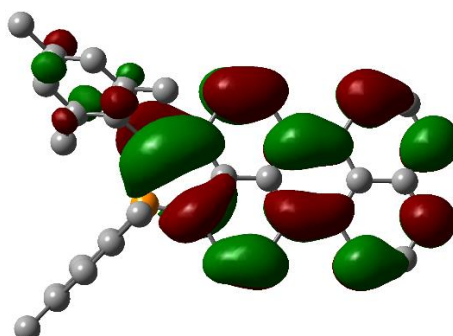

LUMO( $\alpha$ )

**1d**

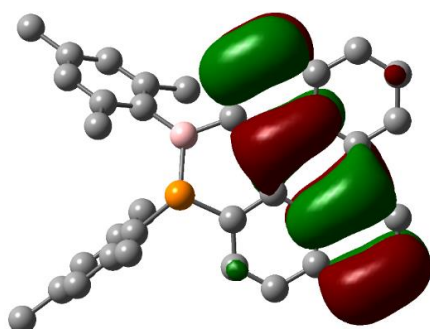

HOMO-5( $\beta$ )

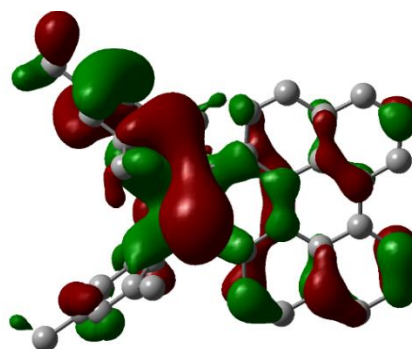

HOMO-2( $\beta$ )

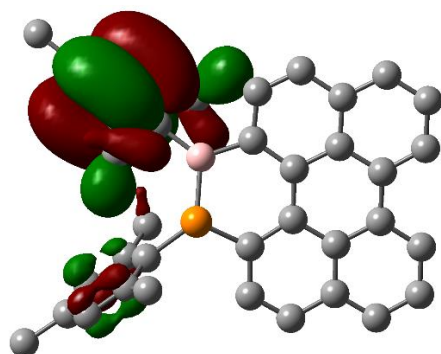

HOMO-1( $\beta$ )

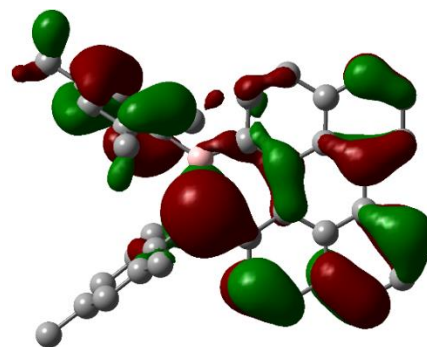

HOMO( $\beta$ )



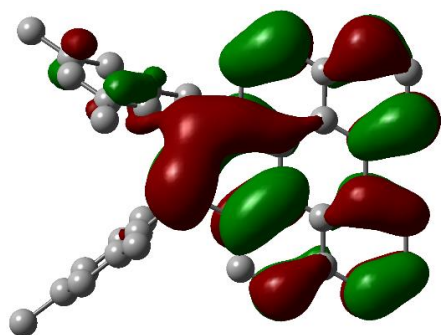

SOMO( $\beta$ )

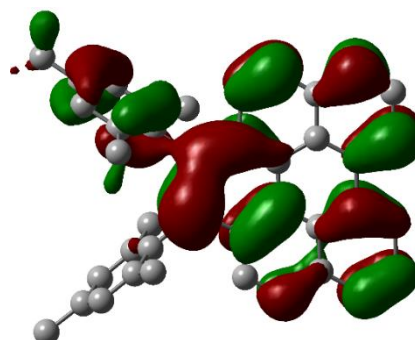

SOMO( $\alpha$ )

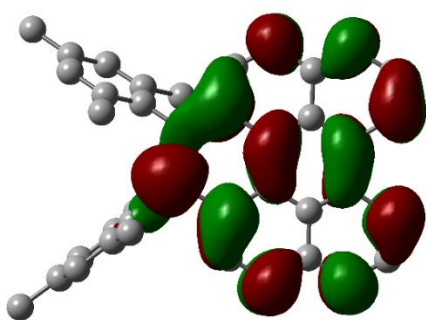

LUMO( $\alpha$ )

2a

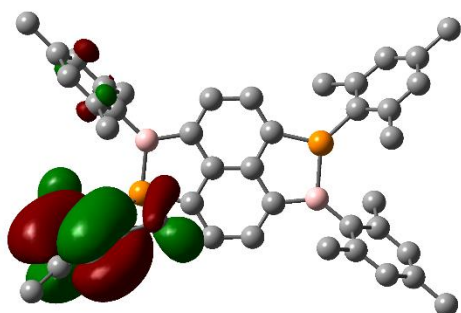

HOMO-3( $\beta$ )

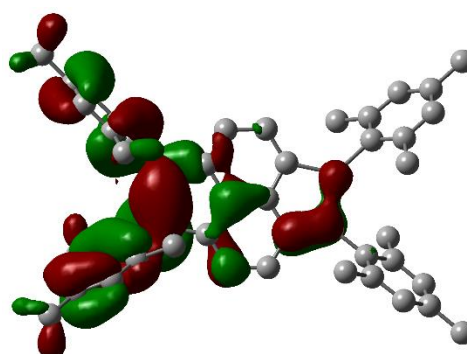

HOMO( $\beta$ )

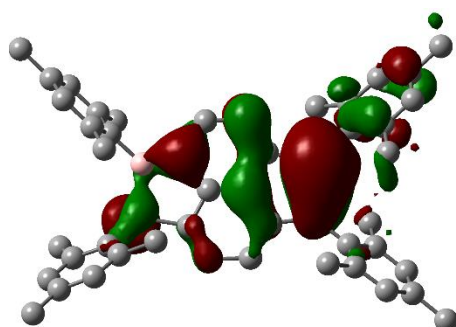

SOMO( $\beta$ )

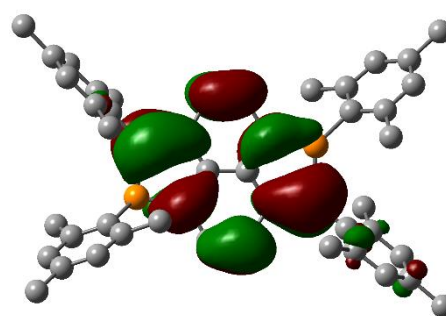

LUMO( $\beta$ )

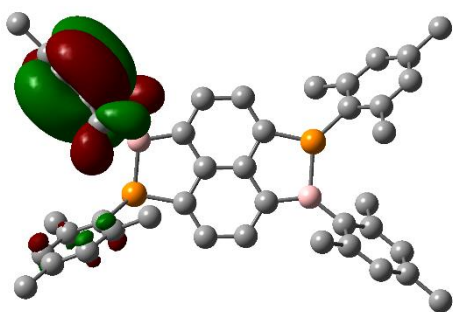

HOMO-1( $\alpha$ )

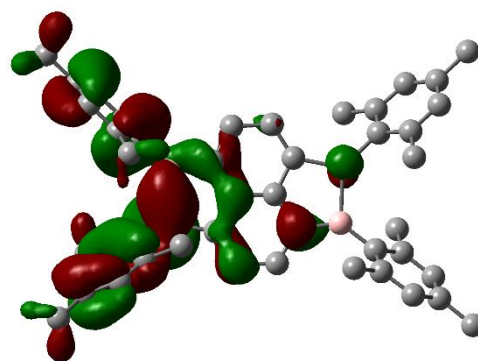

HOMO( $\alpha$ )

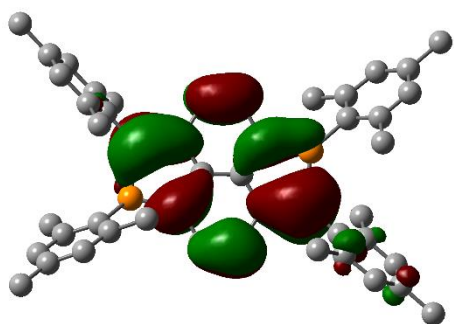

LUMO( $\alpha$ )

2b

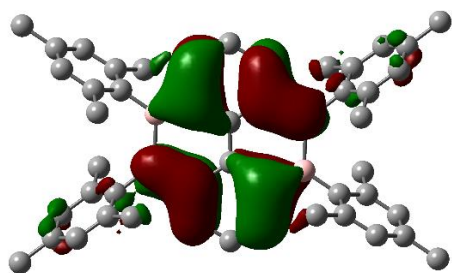

HOMO-10( $\beta$ )

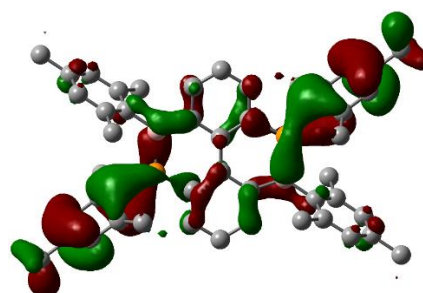

HOMO-9( $\beta$ )

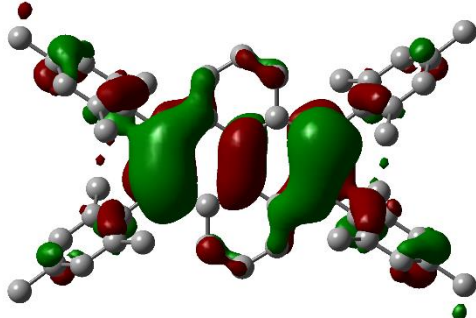

HOMO( $\beta$ )

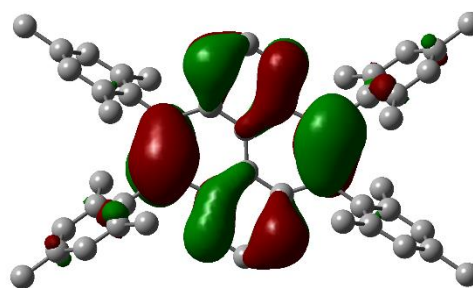

SOMO( $\beta$ )

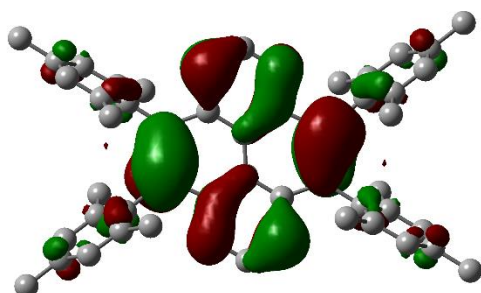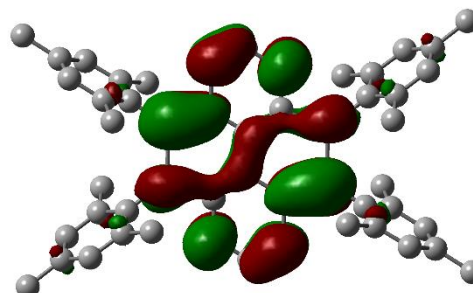

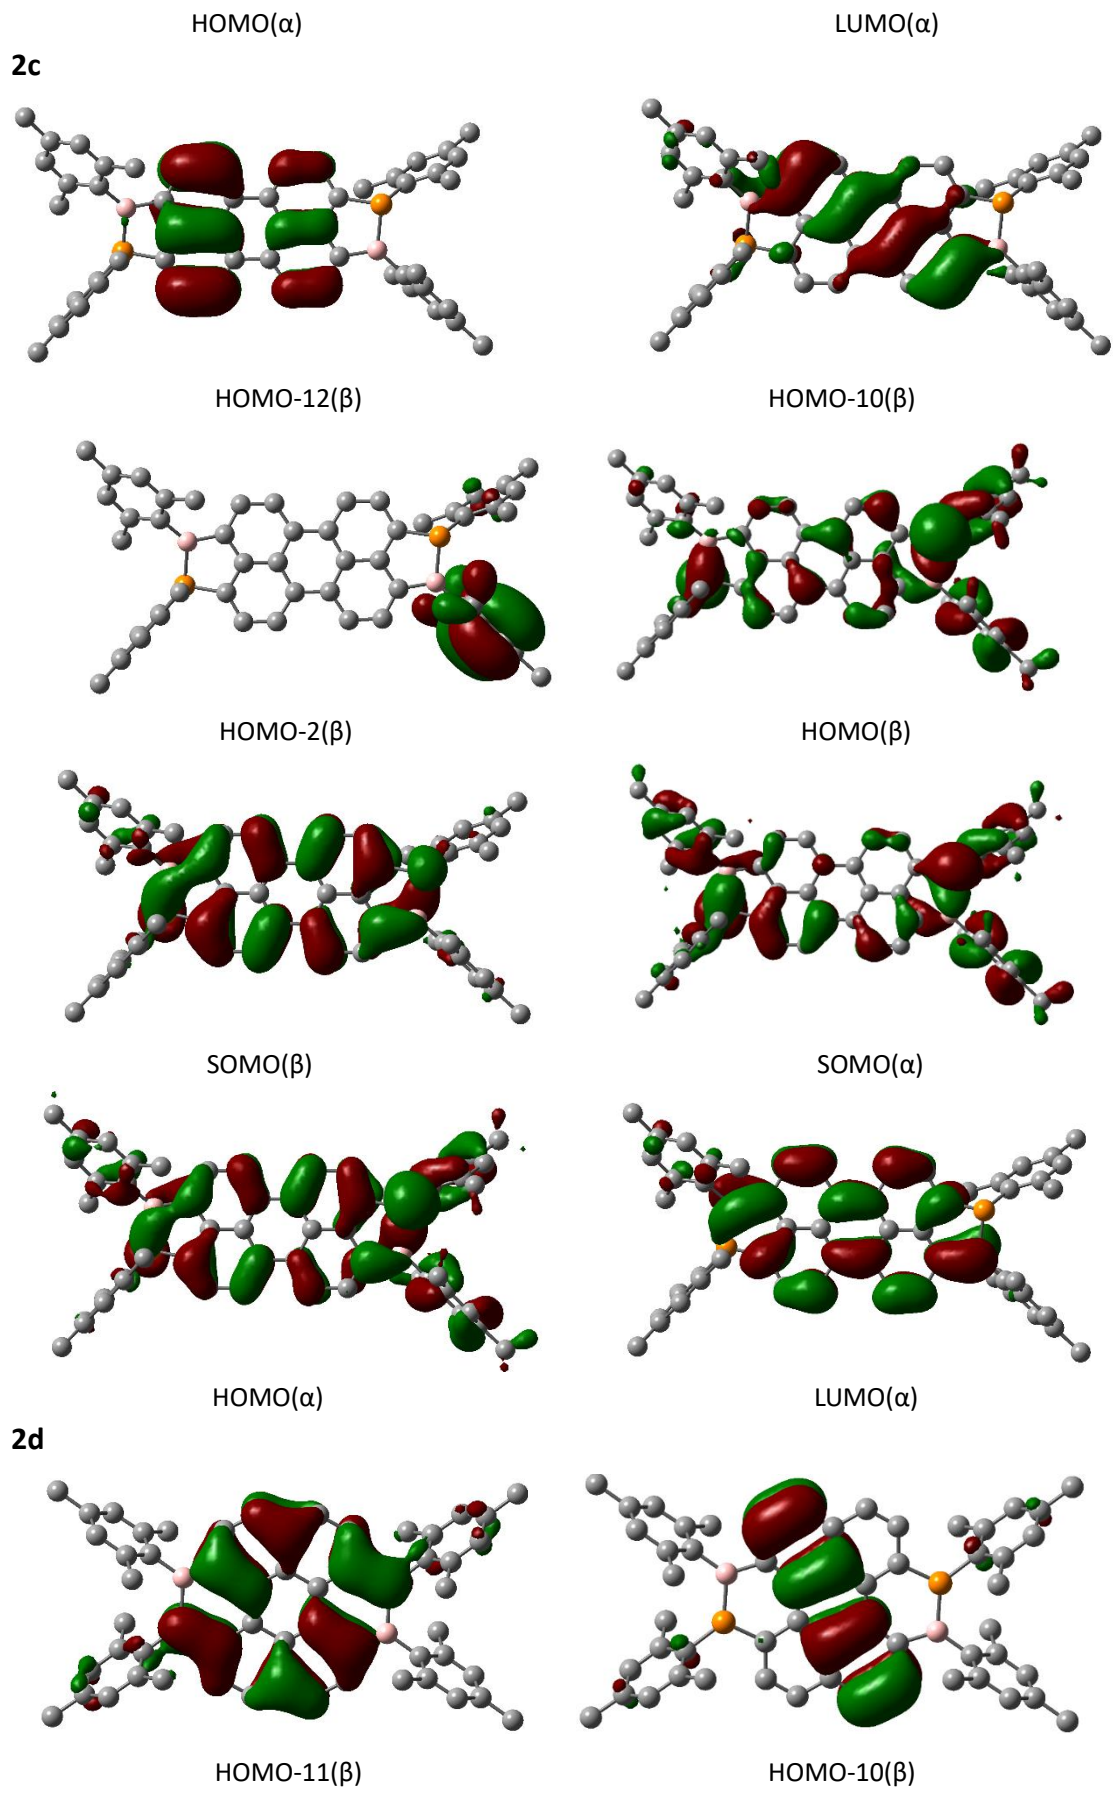



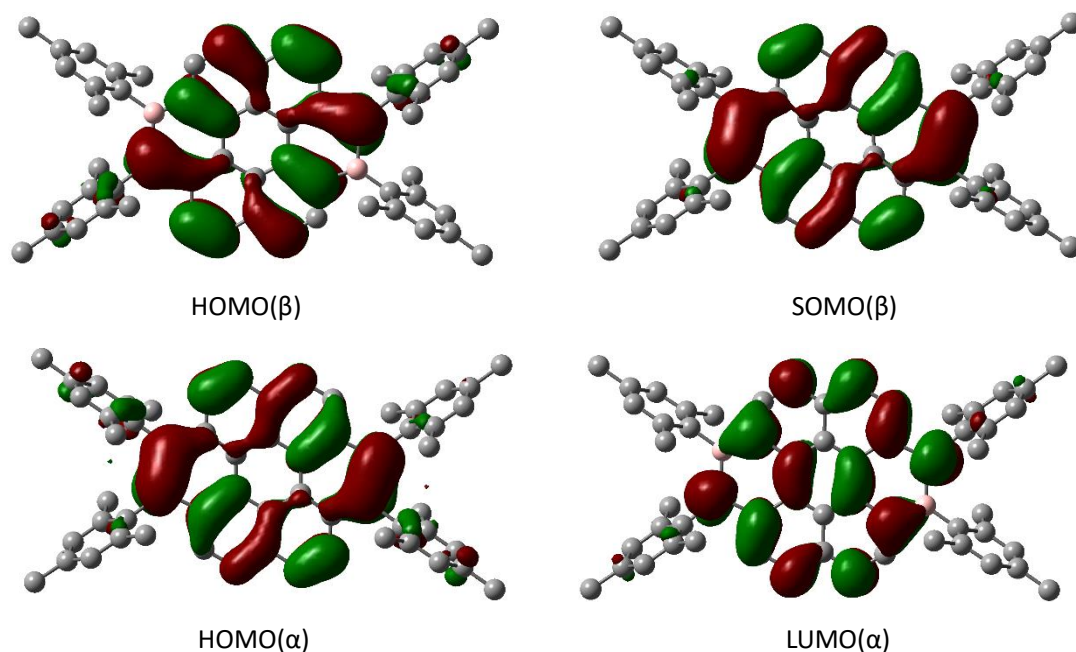

**Fig. S9** The mainly frontier molecular orbitals (isosurface value=0.02 a.u.) related to absorption peaks.

**Cartesian coordinates of the optimized geometries by DFT calculations at UM06-2X-D3/6-31G\* level**

**1a**

| Center Number | Atomic Number | Atomic Type | Coordinates (Angstroms) |          |           |
|---------------|---------------|-------------|-------------------------|----------|-----------|
|               |               |             | X                       | Y        | Z         |
| 1             | 6             | 0           | -1.280680               | 4.593410 | 0.269774  |
| 2             | 6             | 0           | 0.043482                | 4.986968 | 0.241839  |
| 3             | 6             | 0           | 1.090386                | 4.040461 | 0.087076  |
| 4             | 6             | 0           | 0.746937                | 2.678320 | -0.032481 |
| 5             | 6             | 0           | -0.634924               | 2.294144 | -0.041398 |
| 6             | 6             | 0           | -1.635078               | 3.239409 | 0.116372  |
| 7             | 1             | 0           | 2.756770                | 5.424912 | 0.146769  |
| 8             | 1             | 0           | -2.060981               | 5.335098 | 0.399598  |
| 9             | 1             | 0           | 0.297356                | 6.038421 | 0.343957  |
| 10            | 6             | 0           | 2.470151                | 4.380777 | 0.055984  |
| 11            | 6             | 0           | 1.741243                | 1.655217 | -0.138812 |
| 12            | 1             | 0           | -2.680639               | 2.943700 | 0.123645  |
| 13            | 6             | 0           | 3.069881                | 2.043586 | -0.184043 |
| 14            | 6             | 0           | 3.431805                | 3.407044 | -0.090224 |
| 15            | 1             | 0           | 3.846276                | 1.290299 | -0.289651 |
| 16            | 1             | 0           | 4.479777                | 3.684337 | -0.124062 |
| 17            | 5             | 0           | 1.207434                | 0.204391 | -0.221314 |
| 18            | 15            | 0           | -0.705583               | 0.561013 | -0.339140 |

|    |   |   |           |           |           |
|----|---|---|-----------|-----------|-----------|
| 19 | 6 | 0 | 1.874509  | -1.173799 | -0.215192 |
| 20 | 6 | 0 | 1.530638  | -2.145355 | -1.196090 |
| 21 | 6 | 0 | 2.835308  | -1.505335 | 0.771366  |
| 22 | 6 | 0 | 2.175113  | -3.372905 | -1.199730 |
| 23 | 6 | 0 | 3.437592  | -2.762451 | 0.744813  |
| 24 | 6 | 0 | 3.137158  | -3.702278 | -0.237692 |
| 25 | 1 | 0 | 1.925970  | -4.101555 | -1.967825 |
| 26 | 1 | 0 | 4.158664  | -3.016458 | 1.518703  |
| 27 | 6 | 0 | -2.198342 | -0.351644 | 0.012566  |
| 28 | 6 | 0 | -2.242874 | -1.187788 | 1.149391  |
| 29 | 6 | 0 | -3.288120 | -0.241838 | -0.877117 |
| 30 | 6 | 0 | -3.420881 | -1.886452 | 1.389550  |
| 31 | 6 | 0 | -4.440003 | -0.964114 | -0.584393 |
| 32 | 6 | 0 | -4.527794 | -1.784794 | 0.542710  |
| 33 | 1 | 0 | -3.479373 | -2.529194 | 2.264267  |
| 34 | 1 | 0 | -5.289417 | -0.894709 | -1.259022 |
| 35 | 6 | 0 | -1.068465 | -1.330150 | 2.085333  |
| 36 | 1 | 0 | -0.213763 | -1.800338 | 1.585134  |
| 37 | 1 | 0 | -0.739563 | -0.357251 | 2.469983  |
| 38 | 1 | 0 | -1.334909 | -1.950635 | 2.942866  |
| 39 | 6 | 0 | -3.206645 | 0.583887  | -2.137698 |
| 40 | 1 | 0 | -2.900761 | 1.616949  | -1.940639 |
| 41 | 1 | 0 | -2.480820 | 0.154621  | -2.838814 |
| 42 | 1 | 0 | -4.174216 | 0.615973  | -2.641683 |
| 43 | 6 | 0 | -5.796414 | -2.531316 | 0.851072  |
| 44 | 1 | 0 | -5.587165 | -3.477754 | 1.355144  |
| 45 | 1 | 0 | -6.432924 | -1.936291 | 1.515273  |
| 46 | 1 | 0 | -6.366965 | -2.738646 | -0.056973 |
| 47 | 6 | 0 | 3.207789  | -0.576503 | 1.906331  |
| 48 | 1 | 0 | 4.174003  | -0.093624 | 1.723371  |
| 49 | 1 | 0 | 2.470129  | 0.210750  | 2.075404  |
| 50 | 1 | 0 | 3.307711  | -1.144550 | 2.835279  |
| 51 | 6 | 0 | 0.489549  | -1.870474 | -2.257743 |
| 52 | 1 | 0 | -0.522696 | -1.861525 | -1.830464 |
| 53 | 1 | 0 | 0.653082  | -0.914214 | -2.765476 |
| 54 | 1 | 0 | 0.503412  | -2.652283 | -3.020247 |
| 55 | 6 | 0 | 3.827012  | -5.037869 | -0.277759 |
| 56 | 1 | 0 | 4.341358  | -5.250845 | 0.661712  |
| 57 | 1 | 0 | 3.114453  | -5.843759 | -0.474583 |
| 58 | 1 | 0 | 4.571806  | -5.057513 | -1.080837 |

-----  
**1b**

-----  
Center      Atomic      Atomic      Coordinates (Angstroms)

| Number | Number | Type | X         | Y         | Z         |
|--------|--------|------|-----------|-----------|-----------|
| 1      | 6      | 0    | -4.231424 | 2.409762  | 0.948378  |
| 2      | 6      | 0    | -2.886025 | 2.234772  | 0.654698  |
| 3      | 6      | 0    | -2.356264 | 0.980148  | 0.292574  |
| 4      | 6      | 0    | -3.238975 | -0.134441 | 0.195061  |
| 5      | 6      | 0    | -4.584182 | 0.057192  | 0.529528  |
| 6      | 6      | 0    | -5.076186 | 1.306443  | 0.899153  |
| 7      | 6      | 0    | -2.813873 | -1.493529 | -0.246464 |
| 8      | 6      | 0    | -1.471270 | -1.966963 | -0.172666 |
| 9      | 6      | 0    | -1.133332 | -3.283972 | -0.553982 |
| 10     | 1      | 0    | -0.098124 | -3.607003 | -0.481212 |
| 11     | 6      | 0    | -2.101988 | -4.139806 | -1.039507 |
| 12     | 6      | 0    | -3.413063 | -3.673483 | -1.168215 |
| 13     | 6      | 0    | -3.753350 | -2.379292 | -0.786585 |
| 14     | 1      | 0    | -4.610984 | 3.385480  | 1.231692  |
| 15     | 1      | 0    | -2.206239 | 3.080084  | 0.725435  |
| 16     | 1      | 0    | -6.125736 | 1.409023  | 1.155548  |
| 17     | 1      | 0    | -1.842943 | -5.149075 | -1.339188 |
| 18     | 1      | 0    | -4.179302 | -4.321481 | -1.581028 |
| 19     | 15     | 0    | -0.202926 | -0.863588 | 0.319144  |
| 20     | 5      | 0    | -0.820661 | 0.931496  | 0.206228  |
| 21     | 1      | 0    | -5.267921 | -0.783521 | 0.536678  |
| 22     | 1      | 0    | -4.773207 | -2.049047 | -0.942653 |
| 23     | 6      | 0    | 0.193984  | 2.089891  | 0.097144  |
| 24     | 6      | 0    | 1.194884  | 2.292485  | 1.074466  |
| 25     | 6      | 0    | 0.152845  | 2.934198  | -1.040622 |
| 26     | 6      | 0    | 2.112130  | 3.326642  | 0.912233  |
| 27     | 6      | 0    | 1.105546  | 3.938188  | -1.177445 |
| 28     | 6      | 0    | 2.088387  | 4.157756  | -0.208151 |
| 29     | 1      | 0    | 2.866265  | 3.491219  | 1.678511  |
| 30     | 1      | 0    | 1.084432  | 4.570338  | -2.062440 |
| 31     | 6      | 0    | 1.463169  | -1.491110 | 0.135733  |
| 32     | 6      | 0    | 2.214308  | -1.170716 | -1.012778 |
| 33     | 6      | 0    | 1.993530  | -2.286866 | 1.174941  |
| 34     | 6      | 0    | 3.514284  | -1.665392 | -1.093287 |
| 35     | 6      | 0    | 3.296271  | -2.751772 | 1.039654  |
| 36     | 6      | 0    | 4.073442  | -2.446935 | -0.081948 |
| 37     | 1      | 0    | 4.106067  | -1.436774 | -1.975926 |
| 38     | 1      | 0    | 3.719931  | -3.367716 | 1.828997  |
| 39     | 6      | 0    | -0.876937 | 2.740280  | -2.131353 |
| 40     | 1      | 0    | -0.976840 | 1.687586  | -2.419908 |
| 41     | 1      | 0    | -1.868076 | 3.081262  | -1.815093 |
| 42     | 1      | 0    | -0.601636 | 3.304027  | -3.025346 |



|    |   |   |          |           |           |
|----|---|---|----------|-----------|-----------|
| 43 | 6 | 0 | 1.280765 | 1.425233  | 2.309930  |
| 44 | 1 | 0 | 0.293449 | 1.191808  | 2.722489  |
| 45 | 1 | 0 | 1.796799 | 0.479888  | 2.094377  |
| 46 | 1 | 0 | 1.852301 | 1.925849  | 3.095117  |
| 47 | 6 | 0 | 3.077833 | 5.280818  | -0.360383 |
| 48 | 1 | 0 | 3.355658 | 5.424752  | -1.407700 |
| 49 | 1 | 0 | 2.644916 | 6.221842  | -0.003397 |
| 50 | 1 | 0 | 3.985808 | 5.093343  | 0.217474  |
| 51 | 6 | 0 | 1.184514 | -2.627249 | 2.402957  |
| 52 | 1 | 0 | 0.889895 | -1.723986 | 2.951107  |
| 53 | 1 | 0 | 0.268408 | -3.172484 | 2.147607  |
| 54 | 1 | 0 | 1.762262 | -3.253766 | 3.084855  |
| 55 | 6 | 0 | 1.656875 | -0.331363 | -2.134769 |
| 56 | 1 | 0 | 0.653337 | -0.661385 | -2.428687 |
| 57 | 1 | 0 | 1.596239 | 0.723957  | -1.844655 |
| 58 | 1 | 0 | 2.296533 | -0.398801 | -3.016873 |
| 59 | 6 | 0 | 5.490843 | -2.940785 | -0.182143 |
| 60 | 1 | 0 | 5.582769 | -3.958546 | 0.205573  |
| 61 | 1 | 0 | 5.845627 | -2.928870 | -1.214830 |
| 62 | 1 | 0 | 6.157066 | -2.302477 | 0.408281  |

-----  
**1c**  
 -----

| Center<br>Number | Atomic<br>Number | Atomic<br>Type | Coordinates (Angstroms) |           |           |
|------------------|------------------|----------------|-------------------------|-----------|-----------|
|                  |                  |                | X                       | Y         | Z         |
| 1                | 6                | 0              | -2.334832               | 2.425685  | 0.456629  |
| 2                | 6                | 0              | -3.060706               | 1.237170  | 0.284554  |
| 3                | 6                | 0              | -2.347391               | 0.005976  | 0.274885  |
| 4                | 6                | 0              | -0.944458               | 0.039362  | 0.428020  |
| 5                | 6                | 0              | -0.216865               | 1.245866  | 0.505799  |
| 6                | 6                | 0              | -0.944718               | 2.434989  | 0.559474  |
| 7                | 6                | 0              | -2.991231               | -1.254883 | 0.090063  |
| 8                | 6                | 0              | -0.177706               | -1.169343 | 0.513555  |
| 9                | 1                | 0              | -0.425373               | 3.383940  | 0.663279  |
| 10               | 6                | 0              | -0.823578               | -2.393855 | 0.297231  |
| 11               | 6                | 0              | -2.190246               | -2.423435 | 0.078261  |
| 12               | 1                | 0              | -0.257999               | -3.320805 | 0.324406  |
| 13               | 6                | 0              | -6.675152               | 2.326079  | -0.036697 |
| 14               | 6                | 0              | -7.313203               | 1.118329  | -0.210360 |
| 15               | 6                | 0              | -6.573138               | -0.086414 | -0.227093 |
| 16               | 6                | 0              | -5.159241               | -0.052889 | -0.062433 |
| 17               | 6                | 0              | -4.511551               | 1.203693  | 0.116060  |
| 18               | 6                | 0              | -5.285302               | 2.363675  | 0.123452  |

|    |    |   |           |           |           |
|----|----|---|-----------|-----------|-----------|
| 19 | 1  | 0 | -7.241496 | 3.250597  | -0.023515 |
| 20 | 6  | 0 | -7.230635 | -1.326816 | -0.406372 |
| 21 | 6  | 0 | -4.427861 | -1.284141 | -0.081578 |
| 22 | 6  | 0 | -5.130184 | -2.482162 | -0.261952 |
| 23 | 6  | 0 | -6.517108 | -2.506724 | -0.423244 |
| 24 | 1  | 0 | -7.025425 | -3.454631 | -0.559395 |
| 25 | 1  | 0 | -4.600902 | -3.427211 | -0.276841 |
| 26 | 1  | 0 | -2.653558 | -3.389581 | -0.079794 |
| 27 | 1  | 0 | -4.815104 | 3.330801  | 0.256575  |
| 28 | 1  | 0 | -2.852839 | 3.376686  | 0.487255  |
| 29 | 15 | 0 | 1.471716  | -0.837911 | 1.075028  |
| 30 | 5  | 0 | 1.334881  | 1.038041  | 0.547025  |
| 31 | 1  | 0 | -8.390998 | 1.074080  | -0.336869 |
| 32 | 1  | 0 | -8.309815 | -1.333322 | -0.529973 |
| 33 | 6  | 0 | 2.654182  | -1.928254 | 0.227086  |
| 34 | 6  | 0 | 3.418384  | -2.807897 | 1.021484  |
| 35 | 6  | 0 | 2.816915  | -1.897494 | -1.175697 |
| 36 | 6  | 0 | 4.336244  | -3.648410 | 0.393748  |
| 37 | 6  | 0 | 3.745124  | -2.760564 | -1.752325 |
| 38 | 6  | 0 | 4.515399  | -3.638766 | -0.988225 |
| 39 | 1  | 0 | 4.924585  | -4.331820 | 1.000977  |
| 40 | 1  | 0 | 3.876575  | -2.744143 | -2.831772 |
| 41 | 6  | 0 | 2.471962  | 2.014960  | 0.226844  |
| 42 | 6  | 0 | 3.658184  | 2.042657  | 1.014713  |
| 43 | 6  | 0 | 2.363977  | 2.916237  | -0.867009 |
| 44 | 6  | 0 | 4.638547  | 2.988699  | 0.750516  |
| 45 | 6  | 0 | 3.388254  | 3.826782  | -1.113282 |
| 46 | 6  | 0 | 4.521754  | 3.896701  | -0.305743 |
| 47 | 1  | 0 | 5.529108  | 3.017485  | 1.374034  |
| 48 | 1  | 0 | 3.304030  | 4.497332  | -1.965724 |
| 49 | 6  | 0 | 3.259858  | -2.879471 | 2.522346  |
| 50 | 1  | 0 | 3.423756  | -1.905631 | 2.996455  |
| 51 | 1  | 0 | 2.255225  | -3.210338 | 2.805565  |
| 52 | 1  | 0 | 3.976884  | -3.583956 | 2.948641  |
| 53 | 6  | 0 | 5.533775  | -4.533249 | -1.642785 |
| 54 | 1  | 0 | 6.476470  | -3.994828 | -1.789467 |
| 55 | 1  | 0 | 5.745479  | -5.411385 | -1.028372 |
| 56 | 1  | 0 | 5.191955  | -4.871150 | -2.624438 |
| 57 | 6  | 0 | 2.051829  | -0.948103 | -2.063888 |
| 58 | 1  | 0 | 0.970058  | -1.016422 | -1.906997 |
| 59 | 1  | 0 | 2.354983  | 0.088658  | -1.874897 |
| 60 | 1  | 0 | 2.251575  | -1.163211 | -3.115646 |
| 61 | 6  | 0 | 1.204197  | 2.907911  | -1.841002 |
| 62 | 1  | 0 | 0.455494  | 3.663765  | -1.579832 |

|    |   |   |          |          |           |
|----|---|---|----------|----------|-----------|
| 63 | 1 | 0 | 1.564106 | 3.149336 | -2.844795 |
| 64 | 1 | 0 | 0.694895 | 1.943602 | -1.894373 |
| 65 | 6 | 0 | 3.896525 | 1.069719 | 2.145613  |
| 66 | 1 | 0 | 3.060769 | 1.027037 | 2.849969  |
| 67 | 1 | 0 | 4.062498 | 0.057451 | 1.754185  |
| 68 | 1 | 0 | 4.791044 | 1.348418 | 2.706767  |
| 69 | 6 | 0 | 5.595598 | 4.918520 | -0.557874 |
| 70 | 1 | 0 | 5.490500 | 5.759569 | 0.136524  |
| 71 | 1 | 0 | 6.590592 | 4.491781 | -0.405237 |
| 72 | 1 | 0 | 5.539188 | 5.315523 | -1.573876 |

-----  
**1d**  
 -----

| Center<br>Number | Atomic<br>Number | Atomic<br>Type | Coordinates (Angstroms) |           |           |
|------------------|------------------|----------------|-------------------------|-----------|-----------|
|                  |                  |                | X                       | Y         | Z         |
| 1                | 6                | 0              | -0.704151               | 1.501973  | 0.127934  |
| 2                | 6                | 0              | -1.945350               | 0.776234  | 0.047480  |
| 3                | 6                | 0              | -3.133711               | 1.528363  | -0.234373 |
| 4                | 6                | 0              | -3.052539               | 2.924583  | -0.520392 |
| 5                | 6                | 0              | -1.784586               | 3.580916  | -0.484888 |
| 6                | 6                | 0              | -0.658043               | 2.899037  | -0.156923 |
| 7                | 6                | 0              | -4.416390               | 0.910710  | -0.245702 |
| 8                | 6                | 0              | -4.200249               | 3.652273  | -0.836714 |
| 9                | 1                | 0              | -1.741061               | 4.641794  | -0.714188 |
| 10               | 1                | 0              | 0.300865                | 3.406172  | -0.114797 |
| 11               | 6                | 0              | -5.443680               | 3.029930  | -0.873646 |
| 12               | 6                | 0              | -5.544886               | 1.681405  | -0.580027 |
| 13               | 1                | 0              | -4.108693               | 4.711298  | -1.059274 |
| 14               | 1                | 0              | -6.331919               | 3.596201  | -1.131098 |
| 15               | 6                | 0              | -1.069934               | -2.880676 | 0.592201  |
| 16               | 6                | 0              | -2.320202               | -3.444346 | 0.719223  |
| 17               | 6                | 0              | -3.473266               | -2.648816 | 0.562946  |
| 18               | 6                | 0              | -3.339531               | -1.254709 | 0.290039  |
| 19               | 6                | 0              | -2.032931               | -0.656241 | 0.229389  |
| 20               | 6                | 0              | -0.888104               | -1.504251 | 0.349888  |
| 21               | 1                | 0              | -4.817035               | -4.303509 | 0.890116  |
| 22               | 1                | 0              | -0.187782               | -3.507104 | 0.686815  |
| 23               | 1                | 0              | -2.432148               | -4.505691 | 0.921906  |
| 24               | 6                | 0              | -4.750979               | -3.241686 | 0.672197  |
| 25               | 6                | 0              | -4.523138               | -0.494765 | 0.090148  |
| 26               | 6                | 0              | -5.772549               | -1.124998 | 0.220110  |
| 27               | 6                | 0              | -5.890972               | -2.481393 | 0.511051  |
| 28               | 1                | 0              | -6.873360               | -2.930104 | 0.606015  |



|    |    |   |           |           |           |
|----|----|---|-----------|-----------|-----------|
| 29 | 15 | 0 | 0.777748  | 0.740521  | 0.653399  |
| 30 | 5  | 0 | 0.608495  | -1.065793 | 0.293300  |
| 31 | 1  | 0 | -6.683012 | -0.550746 | 0.104826  |
| 32 | 1  | 0 | -6.523601 | 1.221522  | -0.627074 |
| 33 | 6  | 0 | 2.238444  | 1.735781  | 0.285687  |
| 34 | 6  | 0 | 2.820492  | 1.718308  | -0.998845 |
| 35 | 6  | 0 | 2.786215  | 2.517253  | 1.324615  |
| 36 | 6  | 0 | 3.964133  | 2.486021  | -1.210331 |
| 37 | 6  | 0 | 3.929833  | 3.265396  | 1.058397  |
| 38 | 6  | 0 | 4.536885  | 3.256484  | -0.198236 |
| 39 | 1  | 0 | 4.421093  | 2.483211  | -2.196919 |
| 40 | 1  | 0 | 4.357520  | 3.873918  | 1.851339  |
| 41 | 6  | 0 | 1.814635  | -2.010711 | 0.045633  |
| 42 | 6  | 0 | 1.856776  | -2.760519 | -1.155127 |
| 43 | 6  | 0 | 2.890980  | -2.115414 | 0.956746  |
| 44 | 6  | 0 | 2.946750  | -3.588172 | -1.411701 |
| 45 | 6  | 0 | 3.948203  | -2.976194 | 0.675561  |
| 46 | 6  | 0 | 3.997204  | -3.721522 | -0.502915 |
| 47 | 1  | 0 | 2.980669  | -4.143387 | -2.346757 |
| 48 | 1  | 0 | 4.762463  | -3.064485 | 1.391472  |
| 49 | 6  | 0 | 2.928146  | -1.316916 | 2.239259  |
| 50 | 1  | 0 | 3.662343  | -1.733217 | 2.933028  |
| 51 | 1  | 0 | 3.222680  | -0.277695 | 2.042595  |
| 52 | 1  | 0 | 1.959249  | -1.301791 | 2.748621  |
| 53 | 6  | 0 | 5.143658  | -4.657023 | -0.778013 |
| 54 | 1  | 0 | 4.934118  | -5.651608 | -0.368773 |
| 55 | 1  | 0 | 5.314135  | -4.771701 | -1.851363 |
| 56 | 1  | 0 | 6.067660  | -4.299532 | -0.316712 |
| 57 | 6  | 0 | 0.760327  | -2.665389 | -2.194983 |
| 58 | 1  | 0 | -0.079392 | -3.328006 | -1.957493 |
| 59 | 1  | 0 | 0.356749  | -1.650814 | -2.283134 |
| 60 | 1  | 0 | 1.139525  | -2.957388 | -3.177370 |
| 61 | 6  | 0 | 2.252274  | 0.905974  | -2.134371 |
| 62 | 1  | 0 | 1.176539  | 1.075991  | -2.254012 |
| 63 | 1  | 0 | 2.741326  | 1.168760  | -3.074523 |
| 64 | 1  | 0 | 2.406563  | -0.165514 | -1.962996 |
| 65 | 6  | 0 | 2.156380  | 2.574092  | 2.695759  |
| 66 | 1  | 0 | 2.105679  | 1.581999  | 3.158328  |
| 67 | 1  | 0 | 2.733579  | 3.223582  | 3.356804  |
| 68 | 1  | 0 | 1.133589  | 2.965345  | 2.652262  |
| 69 | 6  | 0 | 5.793268  | 4.045973  | -0.450017 |
| 70 | 1  | 0 | 6.675758  | 3.442576  | -0.210918 |
| 71 | 1  | 0 | 5.871478  | 4.345243  | -1.497916 |
| 72 | 1  | 0 | 5.829269  | 4.944049  | 0.171350  |

-----  
**2a**  
-----

| Center<br>Number | Atomic<br>Number | Atomic<br>Type | Coordinates (Angstroms) |           |           |
|------------------|------------------|----------------|-------------------------|-----------|-----------|
|                  |                  |                | X                       | Y         | Z         |
| 1                | 6                | 0              | -0.734908               | -2.335154 | -0.963948 |
| 2                | 6                | 0              | -1.441278               | -1.161075 | -0.769258 |
| 3                | 6                | 0              | -0.728293               | 0.021932  | -0.394394 |
| 4                | 6                | 0              | 0.651516                | -0.012806 | -0.251126 |
| 5                | 6                | 0              | 1.391486                | -1.232581 | -0.424448 |
| 6                | 6                | 0              | 0.668505                | -2.366095 | -0.782238 |
| 7                | 1                | 0              | -1.253481               | -3.242078 | -1.261881 |
| 8                | 6                | 0              | -1.476092               | 1.211693  | -0.152567 |
| 9                | 6                | 0              | 1.331990                | 1.196744  | 0.108416  |
| 10               | 1                | 0              | 1.197171                | -3.303423 | -0.940412 |
| 11               | 6                | 0              | 0.615574                | 2.359295  | 0.357773  |
| 12               | 6                | 0              | -0.792472               | 2.356926  | 0.231817  |
| 13               | 1                | 0              | 1.129076                | 3.264781  | 0.668867  |
| 14               | 1                | 0              | -1.347328               | 3.266726  | 0.447221  |
| 15               | 5                | 0              | -3.032200               | 0.992276  | -0.289411 |
| 16               | 15               | 0              | -3.176387               | -0.733418 | -1.069803 |
| 17               | 6                | 0              | -4.154156               | 2.027310  | -0.005229 |
| 18               | 6                | 0              | -4.905696               | 1.961778  | 1.183963  |
| 19               | 6                | 0              | -4.424766               | 3.044174  | -0.939915 |
| 20               | 6                | 0              | -5.895965               | 2.909355  | 1.423046  |
| 21               | 6                | 0              | -5.431718               | 3.971643  | -0.673193 |
| 22               | 6                | 0              | -6.174875               | 3.923877  | 0.504683  |
| 23               | 1                | 0              | -6.468993               | 2.856071  | 2.346736  |
| 24               | 1                | 0              | -5.642434               | 4.749102  | -1.404585 |
| 25               | 6                | 0              | -4.356926               | -1.935022 | -0.379407 |
| 26               | 6                | 0              | -5.545105               | -2.140933 | -1.113783 |
| 27               | 6                | 0              | -4.144886               | -2.609733 | 0.840998  |
| 28               | 6                | 0              | -6.487037               | -3.042360 | -0.626737 |
| 29               | 6                | 0              | -5.117958               | -3.509704 | 1.278744  |
| 30               | 6                | 0              | -6.286864               | -3.747673 | 0.559863  |
| 31               | 1                | 0              | -7.406221               | -3.195683 | -1.187251 |
| 32               | 1                | 0              | -4.960238               | -4.031013 | 2.220242  |
| 33               | 6                | 0              | -7.308605               | -4.742039 | 1.043697  |
| 34               | 1                | 0              | -8.325301               | -4.377767 | 0.873583  |
| 35               | 1                | 0              | -7.206028               | -5.691265 | 0.506674  |
| 36               | 1                | 0              | -7.190117               | -4.948095 | 2.110074  |
| 37               | 6                | 0              | -2.931863               | -2.391607 | 1.710708  |
| 38               | 1                | 0              | -2.069496               | -2.967599 | 1.358377  |

|    |    |   |           |           |           |
|----|----|---|-----------|-----------|-----------|
| 39 | 1  | 0 | -2.631767 | -1.338981 | 1.733548  |
| 40 | 1  | 0 | -3.144066 | -2.705442 | 2.735409  |
| 41 | 6  | 0 | -5.835922 | -1.386510 | -2.389074 |
| 42 | 1  | 0 | -5.889594 | -0.306518 | -2.209799 |
| 43 | 1  | 0 | -5.059018 | -1.553758 | -3.141893 |
| 44 | 1  | 0 | -6.793125 | -1.701799 | -2.809481 |
| 45 | 6  | 0 | -4.634837 | 0.871207  | 2.192907  |
| 46 | 1  | 0 | -4.870593 | -0.116978 | 1.778588  |
| 47 | 1  | 0 | -3.580417 | 0.861445  | 2.496948  |
| 48 | 1  | 0 | -5.236259 | 1.005771  | 3.095263  |
| 49 | 6  | 0 | -3.662536 | 3.106413  | -2.242787 |
| 50 | 1  | 0 | -2.578615 | 3.119042  | -2.077273 |
| 51 | 1  | 0 | -3.880912 | 2.234276  | -2.871029 |
| 52 | 1  | 0 | -3.923962 | 4.000742  | -2.813319 |
| 53 | 6  | 0 | -7.240860 | 4.948160  | 0.795581  |
| 54 | 1  | 0 | -7.530263 | 5.488800  | -0.108773 |
| 55 | 1  | 0 | -8.135231 | 4.478736  | 1.215068  |
| 56 | 1  | 0 | -6.885152 | 5.683781  | 1.525187  |
| 57 | 5  | 0 | 2.905327  | -1.119535 | -0.211712 |
| 58 | 15 | 0 | 3.039953  | 0.772997  | 0.230965  |
| 59 | 6  | 0 | 4.085226  | -2.109175 | -0.251341 |
| 60 | 6  | 0 | 5.121756  | -1.944290 | -1.194738 |
| 61 | 6  | 0 | 4.151133  | -3.169261 | 0.678778  |
| 62 | 6  | 0 | 6.178402  | -2.849575 | -1.215336 |
| 63 | 6  | 0 | 5.235825  | -4.041620 | 0.639863  |
| 64 | 6  | 0 | 6.252344  | -3.907152 | -0.307211 |
| 65 | 1  | 0 | 6.966484  | -2.728692 | -1.955361 |
| 66 | 1  | 0 | 5.292655  | -4.847792 | 1.367918  |
| 67 | 6  | 0 | 5.095235  | -0.800271 | -2.182609 |
| 68 | 1  | 0 | 4.117028  | -0.701281 | -2.667099 |
| 69 | 1  | 0 | 5.325532  | 0.155196  | -1.692203 |
| 70 | 1  | 0 | 5.838462  | -0.944742 | -2.970086 |
| 71 | 6  | 0 | 3.089153  | -3.343187 | 1.740794  |
| 72 | 1  | 0 | 2.899888  | -2.407284 | 2.279960  |
| 73 | 1  | 0 | 2.134672  | -3.665984 | 1.312716  |
| 74 | 1  | 0 | 3.392594  | -4.092464 | 2.475241  |
| 75 | 6  | 0 | 7.390635  | -4.890906 | -0.361303 |
| 76 | 1  | 0 | 7.145455  | -5.723944 | -1.029246 |
| 77 | 1  | 0 | 8.302941  | -4.422998 | -0.739634 |
| 78 | 1  | 0 | 7.600359  | -5.310657 | 0.625652  |
| 79 | 6  | 0 | 4.343741  | 1.974281  | 0.342633  |
| 80 | 6  | 0 | 5.368760  | 1.733506  | 1.288669  |
| 81 | 6  | 0 | 4.388700  | 3.082748  | -0.535458 |
| 82 | 6  | 0 | 6.408644  | 2.651161  | 1.369199  |

|    |   |   |          |           |           |
|----|---|---|----------|-----------|-----------|
| 83 | 6 | 0 | 5.455503 | 3.964633  | -0.406270 |
| 84 | 6 | 0 | 6.463728 | 3.777116  | 0.543385  |
| 85 | 1 | 0 | 7.200905 | 2.484732  | 2.094396  |
| 86 | 1 | 0 | 5.514064 | 4.816371  | -1.079123 |
| 87 | 6 | 0 | 3.368939 | 3.298793  | -1.625357 |
| 88 | 1 | 0 | 3.176924 | 2.376834  | -2.185866 |
| 89 | 1 | 0 | 2.410101 | 3.647742  | -1.231182 |
| 90 | 1 | 0 | 3.726650 | 4.049286  | -2.332571 |
| 91 | 6 | 0 | 5.350489 | 0.522632  | 2.188743  |
| 92 | 1 | 0 | 4.470733 | 0.521903  | 2.842238  |
| 93 | 1 | 0 | 5.342014 | -0.409268 | 1.609061  |
| 94 | 1 | 0 | 6.236994 | 0.505826  | 2.825260  |
| 95 | 6 | 0 | 7.583464 | 4.771067  | 0.678190  |
| 96 | 1 | 0 | 7.319830 | 5.537754  | 1.415327  |
| 97 | 1 | 0 | 8.503545 | 4.289509  | 1.017424  |
| 98 | 1 | 0 | 7.782606 | 5.277389  | -0.269057 |

-----  
**2b**

| Center<br>Number | Atomic<br>Number | Atomic<br>Type | Coordinates (Angstroms) |           |           |
|------------------|------------------|----------------|-------------------------|-----------|-----------|
|                  |                  |                | X                       | Y         | Z         |
| 1                | 6                | 0              | -0.003674               | -0.722368 | -0.147794 |
| 2                | 6                | 0              | -1.206334               | -1.509793 | -0.289478 |
| 3                | 6                | 0              | -1.120809               | -2.876338 | -0.625512 |
| 4                | 6                | 0              | 0.082987                | -3.548625 | -0.816583 |
| 5                | 6                | 0              | 1.243579                | -2.835934 | -0.646262 |
| 6                | 6                | 0              | 1.222925                | -1.458515 | -0.307069 |
| 7                | 6                | 0              | 0.003661                | 0.722359  | 0.147753  |
| 8                | 6                | 0              | -1.222933               | 1.458494  | 0.307077  |
| 9                | 6                | 0              | -1.243583               | 2.835909  | 0.646294  |
| 10               | 6                | 0              | -0.082993               | 3.548613  | 0.816555  |
| 11               | 6                | 0              | 1.120805                | 2.876340  | 0.625426  |
| 12               | 6                | 0              | 1.206323                | 1.509794  | 0.289406  |
| 13               | 1                | 0              | -2.051696               | -3.423814 | -0.743965 |
| 14               | 1                | 0              | 0.102581                | -4.597936 | -1.089147 |
| 15               | 1                | 0              | 2.206692                | -3.320825 | -0.783730 |
| 16               | 1                | 0              | -2.206695               | 3.320783  | 0.783831  |
| 17               | 1                | 0              | -0.102588               | 4.597922  | 1.089128  |
| 18               | 1                | 0              | 2.051691                | 3.423825  | 0.743838  |
| 19               | 5                | 0              | -2.681213               | -1.070380 | -0.151421 |
| 20               | 15               | 0              | -2.791428               | 0.718409  | 0.138575  |
| 21               | 15               | 0              | 2.791418                | -0.718428 | -0.138563 |
| 22               | 5                | 0              | 2.681192                | 1.070378  | 0.151364  |



|    |   |   |           |           |           |
|----|---|---|-----------|-----------|-----------|
| 23 | 6 | 0 | 3.963024  | 1.964937  | 0.199426  |
| 24 | 6 | 0 | 4.249020  | 2.831942  | -0.877699 |
| 25 | 6 | 0 | 4.870511  | 1.880200  | 1.272903  |
| 26 | 6 | 0 | 5.417060  | 3.591201  | -0.858271 |
| 27 | 6 | 0 | 6.021724  | 2.666771  | 1.265693  |
| 28 | 6 | 0 | 6.312972  | 3.529498  | 0.210111  |
| 29 | 1 | 0 | 5.635947  | 4.247933  | -1.697830 |
| 30 | 1 | 0 | 6.712298  | 2.601658  | 2.103966  |
| 31 | 6 | 0 | 4.222103  | -1.798736 | -0.169806 |
| 32 | 6 | 0 | 5.176308  | -1.638416 | -1.196530 |
| 33 | 6 | 0 | 4.414175  | -2.732839 | 0.872966  |
| 34 | 6 | 0 | 6.308994  | -2.447694 | -1.170662 |
| 35 | 6 | 0 | 5.563907  | -3.517043 | 0.845321  |
| 36 | 6 | 0 | 6.517277  | -3.394633 | -0.167301 |
| 37 | 1 | 0 | 7.052174  | -2.333981 | -1.955900 |
| 38 | 1 | 0 | 5.727085  | -4.236770 | 1.643677  |
| 39 | 6 | 0 | -3.963028 | -1.964957 | -0.199526 |
| 40 | 6 | 0 | -4.870496 | -1.880194 | -1.273018 |
| 41 | 6 | 0 | -4.249043 | -2.831986 | 0.877576  |
| 42 | 6 | 0 | -6.021711 | -2.666762 | -1.265848 |
| 43 | 6 | 0 | -5.417092 | -3.591231 | 0.858113  |
| 44 | 6 | 0 | -6.312984 | -3.529503 | -0.210284 |
| 45 | 1 | 0 | -6.712268 | -2.601623 | -2.104133 |
| 46 | 1 | 0 | -5.636009 | -4.247969 | 1.697658  |
| 47 | 6 | 0 | -4.222108 | 1.798721  | 0.169893  |
| 48 | 6 | 0 | -5.176310 | 1.638364  | 1.196625  |
| 49 | 6 | 0 | -4.414166 | 2.732894  | -0.872810 |
| 50 | 6 | 0 | -6.308964 | 2.447681  | 1.170825  |
| 51 | 6 | 0 | -5.563876 | 3.517138  | -0.845099 |
| 52 | 6 | 0 | -6.517229 | 3.394699  | 0.167529  |
| 53 | 1 | 0 | -7.052140 | 2.333943  | 1.956064  |
| 54 | 1 | 0 | -5.727039 | 4.236915  | -1.643413 |
| 55 | 6 | 0 | -4.622936 | -0.938182 | -2.428598 |
| 56 | 1 | 0 | -4.861881 | 0.096560  | -2.148863 |
| 57 | 1 | 0 | -3.578258 | -0.961417 | -2.757856 |
| 58 | 1 | 0 | -5.249824 | -1.195657 | -3.285795 |
| 59 | 6 | 0 | -7.549381 | -4.389650 | -0.230958 |
| 60 | 1 | 0 | -7.330342 | -5.371230 | -0.665419 |
| 61 | 1 | 0 | -7.933959 | -4.555919 | 0.778711  |
| 62 | 1 | 0 | -8.341074 | -3.933024 | -0.830225 |
| 63 | 6 | 0 | -3.316334 | -2.929184 | 2.063644  |
| 64 | 1 | 0 | -2.380173 | -3.435754 | 1.802520  |
| 65 | 1 | 0 | -3.045449 | -1.937538 | 2.446449  |
| 66 | 1 | 0 | -3.779353 | -3.488483 | 2.879910  |

|     |   |   |           |           |           |
|-----|---|---|-----------|-----------|-----------|
| 67  | 6 | 0 | -3.432813 | 2.888829  | -2.008377 |
| 68  | 1 | 0 | -2.499308 | 3.359065  | -1.680087 |
| 69  | 1 | 0 | -3.170903 | 1.919942  | -2.448316 |
| 70  | 1 | 0 | -3.858844 | 3.512796  | -2.796383 |
| 71  | 6 | 0 | -5.009746 | 0.614712  | 2.291344  |
| 72  | 1 | 0 | -4.039407 | 0.711823  | 2.790512  |
| 73  | 1 | 0 | -5.789876 | 0.730531  | 3.046399  |
| 74  | 1 | 0 | -5.080696 | -0.403094 | 1.888830  |
| 75  | 6 | 0 | -7.736334 | 4.276645  | 0.185876  |
| 76  | 1 | 0 | -8.589499 | 3.764247  | 0.636878  |
| 77  | 1 | 0 | -7.543886 | 5.180077  | 0.774968  |
| 78  | 1 | 0 | -8.014043 | 4.591926  | -0.822644 |
| 79  | 6 | 0 | 5.009715  | -0.614862 | -2.291335 |
| 80  | 1 | 0 | 4.039383  | -0.712056 | -2.790501 |
| 81  | 1 | 0 | 5.080624  | 0.402982  | -1.888911 |
| 82  | 1 | 0 | 5.789854  | -0.730716 | -3.046375 |
| 83  | 6 | 0 | 3.432803  | -2.888718 | 2.008523  |
| 84  | 1 | 0 | 3.171022  | -1.919818 | 2.448512  |
| 85  | 1 | 0 | 2.499237  | -3.358816 | 1.680211  |
| 86  | 1 | 0 | 3.858754  | -3.512777 | 2.796500  |
| 87  | 6 | 0 | 7.736403  | -4.276553 | -0.185561 |
| 88  | 1 | 0 | 7.543879  | -5.180185 | -0.774321 |
| 89  | 1 | 0 | 8.589485  | -3.764287 | -0.636871 |
| 90  | 1 | 0 | 8.014284  | -4.591498 | 0.823018  |
| 91  | 6 | 0 | 3.316282  | 2.929142  | -2.063746 |
| 92  | 1 | 0 | 3.045220  | 1.937500  | -2.446430 |
| 93  | 1 | 0 | 2.380214  | 3.435902  | -1.802649 |
| 94  | 1 | 0 | 3.779364  | 3.488274  | -2.880091 |
| 95  | 6 | 0 | 4.622979  | 0.938213  | 2.428508  |
| 96  | 1 | 0 | 3.578296  | 0.961410  | 2.757752  |
| 97  | 1 | 0 | 4.861983  | -0.096524 | 2.148811  |
| 98  | 1 | 0 | 5.249841  | 1.195747  | 3.285706  |
| 99  | 6 | 0 | 7.549375  | 4.389640  | 0.230727  |
| 100 | 1 | 0 | 7.934154  | 4.555542  | -0.778925 |
| 101 | 1 | 0 | 7.330264  | 5.371379  | 0.664797  |
| 102 | 1 | 0 | 8.340940  | 3.933212  | 0.830311  |

-----  
**2c**  
-----

| Center<br>Number | Atomic<br>Number | Atomic<br>Type | Coordinates (Angstroms) |           |          |
|------------------|------------------|----------------|-------------------------|-----------|----------|
|                  |                  |                | X                       | Y         | Z        |
| 1                | 6                | 0              | -1.526675               | -2.548880 | 0.007651 |
| 2                | 6                | 0              | -0.750077               | -1.373479 | 0.004811 |

|    |    |   |           |           |           |
|----|----|---|-----------|-----------|-----------|
| 3  | 6  | 0 | -1.408157 | -0.126100 | 0.217761  |
| 4  | 6  | 0 | -2.807915 | -0.132733 | 0.411099  |
| 5  | 6  | 0 | -3.584074 | -1.307056 | 0.309665  |
| 6  | 6  | 0 | -2.910482 | -2.520813 | 0.148564  |
| 7  | 6  | 0 | -0.722486 | 1.121387  | 0.221814  |
| 8  | 6  | 0 | -3.523329 | 1.063479  | 0.726629  |
| 9  | 1  | 0 | -3.471737 | -3.450385 | 0.107581  |
| 10 | 6  | 0 | -2.839331 | 2.280600  | 0.693940  |
| 11 | 6  | 0 | -1.475104 | 2.298660  | 0.434506  |
| 12 | 1  | 0 | -3.364414 | 3.209422  | 0.896571  |
| 13 | 6  | 0 | 2.805858  | -2.529309 | -0.633638 |
| 14 | 6  | 0 | 3.493529  | -1.319295 | -0.663796 |
| 15 | 6  | 0 | 2.767678  | -0.114053 | -0.415936 |
| 16 | 6  | 0 | 1.368817  | -0.121538 | -0.213435 |
| 17 | 6  | 0 | 0.682971  | -1.369011 | -0.205233 |
| 18 | 6  | 0 | 1.433372  | -2.545481 | -0.400919 |
| 19 | 1  | 0 | 3.332133  | -3.463216 | -0.808295 |
| 20 | 6  | 0 | 3.529141  | 1.078171  | -0.364222 |
| 21 | 6  | 0 | 0.708471  | 1.127479  | 0.002915  |
| 22 | 6  | 0 | 1.478018  | 2.306030  | 0.005948  |
| 23 | 6  | 0 | 2.860143  | 2.285791  | -0.171543 |
| 24 | 1  | 0 | 3.423210  | 3.214780  | -0.136497 |
| 25 | 1  | 0 | 0.997430  | 3.262693  | 0.174474  |
| 26 | 1  | 0 | -0.975893 | 3.260719  | 0.424874  |
| 27 | 1  | 0 | 0.933704  | -3.507500 | -0.391789 |
| 28 | 1  | 0 | -1.046742 | -3.510101 | -0.135281 |
| 29 | 15 | 0 | -5.189727 | 0.699800  | 1.296615  |
| 30 | 5  | 0 | -5.130635 | -1.034496 | 0.420181  |
| 31 | 6  | 0 | -6.319174 | 1.932909  | 0.558712  |
| 32 | 6  | 0 | -7.063951 | 2.736591  | 1.447913  |
| 33 | 6  | 0 | -6.456536 | 2.100979  | -0.836842 |
| 34 | 6  | 0 | -7.930530 | 3.695398  | 0.924421  |
| 35 | 6  | 0 | -7.330701 | 3.077361  | -1.309088 |
| 36 | 6  | 0 | -8.078933 | 3.880672  | -0.448269 |
| 37 | 1  | 0 | -8.502168 | 4.317511  | 1.608888  |
| 38 | 1  | 0 | -7.436610 | 3.211842  | -2.383188 |
| 39 | 6  | 0 | -6.287907 | -1.936530 | -0.040223 |
| 40 | 6  | 0 | -7.465820 | -2.072261 | 0.748873  |
| 41 | 6  | 0 | -6.200848 | -2.670936 | -1.252251 |
| 42 | 6  | 0 | -8.451430 | -2.972311 | 0.367696  |
| 43 | 6  | 0 | -7.229556 | -3.540204 | -1.610611 |
| 44 | 6  | 0 | -8.350298 | -3.725035 | -0.805883 |
| 45 | 1  | 0 | -9.335445 | -3.084983 | 0.991242  |
| 46 | 1  | 0 | -7.157908 | -4.081707 | -2.551634 |

|    |    |   |            |           |           |
|----|----|---|------------|-----------|-----------|
| 47 | 6  | 0 | -6.944632  | 2.603089  | 2.948760  |
| 48 | 1  | 0 | -7.180412  | 1.588810  | 3.287689  |
| 49 | 1  | 0 | -5.930425  | 2.827285  | 3.294526  |
| 50 | 1  | 0 | -7.630082  | 3.291792  | 3.447096  |
| 51 | 6  | 0 | -9.041927  | 4.902024  | -0.992370 |
| 52 | 1  | 0 | -10.014841 | 4.441079  | -1.195168 |
| 53 | 1  | 0 | -9.203038  | 5.715286  | -0.280676 |
| 54 | 1  | 0 | -8.678606  | 5.329643  | -1.930375 |
| 55 | 6  | 0 | -5.722762  | 1.245077  | -1.839240 |
| 56 | 1  | 0 | -4.645746  | 1.206353  | -1.644840 |
| 57 | 1  | 0 | -6.106008  | 0.218135  | -1.822151 |
| 58 | 1  | 0 | -5.865300  | 1.632335  | -2.850507 |
| 59 | 6  | 0 | -5.066986  | -2.517227 | -2.245528 |
| 60 | 1  | 0 | -4.364719  | -3.356060 | -2.186547 |
| 61 | 1  | 0 | -5.470061  | -2.510689 | -3.262449 |
| 62 | 1  | 0 | -4.497074  | -1.596161 | -2.111910 |
| 63 | 6  | 0 | -7.692373  | -1.260921 | 2.002930  |
| 64 | 1  | 0 | -6.865011  | -1.341169 | 2.713955  |
| 65 | 1  | 0 | -7.821719  | -0.199336 | 1.755994  |
| 66 | 1  | 0 | -8.602263  | -1.588873 | 2.510304  |
| 67 | 6  | 0 | -9.433263  | -4.697932 | -1.184010 |
| 68 | 1  | 0 | -9.379888  | -5.593106 | -0.554759 |
| 69 | 1  | 0 | -10.424502 | -4.258402 | -1.040880 |
| 70 | 1  | 0 | -9.341541  | -5.013807 | -2.225552 |
| 71 | 15 | 0 | 5.206478   | -0.992038 | -1.159176 |
| 72 | 5  | 0 | 5.068324   | 0.843884  | -0.577244 |
| 73 | 6  | 0 | 6.216800   | 1.872129  | -0.447758 |
| 74 | 6  | 0 | 6.653601   | 2.303776  | 0.818777  |
| 75 | 6  | 0 | 6.832854   | 2.390870  | -1.607564 |
| 76 | 6  | 0 | 7.682327   | 3.239625  | 0.910843  |
| 77 | 6  | 0 | 7.848436   | 3.332516  | -1.477875 |
| 78 | 6  | 0 | 8.292865   | 3.765716  | -0.226016 |
| 79 | 1  | 0 | 8.016454   | 3.564718  | 1.893898  |
| 80 | 1  | 0 | 8.304476   | 3.746108  | -2.375233 |
| 81 | 6  | 0 | 6.364118   | -1.901538 | -0.062642 |
| 82 | 6  | 0 | 7.595898   | -2.270939 | -0.649098 |
| 83 | 6  | 0 | 6.113568   | -2.199471 | 1.294162  |
| 84 | 6  | 0 | 8.533167   | -2.958618 | 0.116367  |
| 85 | 6  | 0 | 7.085288   | -2.896115 | 2.015530  |
| 86 | 6  | 0 | 8.292688   | -3.293938 | 1.448068  |
| 87 | 1  | 0 | 9.481524   | -3.235411 | -0.338394 |
| 88 | 1  | 0 | 6.892584   | -3.125124 | 3.061302  |
| 89 | 6  | 0 | 4.855776   | -1.800876 | 2.028689  |
| 90 | 1  | 0 | 4.513167   | -0.799498 | 1.752932  |

|     |   |   |           |           |           |
|-----|---|---|-----------|-----------|-----------|
| 91  | 1 | 0 | 4.030402  | -2.493016 | 1.830451  |
| 92  | 1 | 0 | 5.037359  | -1.804838 | 3.106258  |
| 93  | 6 | 0 | 9.311288  | -4.066427 | 2.243208  |
| 94  | 1 | 0 | 9.272983  | -5.130966 | 1.987776  |
| 95  | 1 | 0 | 10.325222 | -3.715724 | 2.032210  |
| 96  | 1 | 0 | 9.131477  | -3.974574 | 3.316954  |
| 97  | 6 | 0 | 7.948629  | -1.899758 | -2.069852 |
| 98  | 1 | 0 | 7.194176  | -2.245852 | -2.782971 |
| 99  | 1 | 0 | 8.031603  | -0.812013 | -2.181619 |
| 100 | 1 | 0 | 8.910532  | -2.333805 | -2.350778 |
| 101 | 6 | 0 | 6.058919  | 1.709763  | 2.072154  |
| 102 | 1 | 0 | 4.965011  | 1.647098  | 2.010379  |
| 103 | 1 | 0 | 6.437954  | 0.692948  | 2.234780  |
| 104 | 1 | 0 | 6.310713  | 2.302971  | 2.954670  |
| 105 | 6 | 0 | 6.372926  | 1.959692  | -2.981127 |
| 106 | 1 | 0 | 6.586680  | 0.900165  | -3.164377 |
| 107 | 1 | 0 | 5.291623  | 2.093955  | -3.104958 |
| 108 | 1 | 0 | 6.869676  | 2.539655  | -3.762446 |
| 109 | 6 | 0 | 9.417375  | 4.761656  | -0.115470 |
| 110 | 1 | 0 | 10.384478 | 4.272821  | -0.276174 |
| 111 | 1 | 0 | 9.321877  | 5.551294  | -0.866044 |
| 112 | 1 | 0 | 9.440396  | 5.227601  | 0.872612  |

-----  
**2d**  
 -----

| Center<br>Number | Atomic<br>Number | Atomic<br>Type | Coordinates (Angstroms) |           |           |
|------------------|------------------|----------------|-------------------------|-----------|-----------|
|                  |                  |                | X                       | Y         | Z         |
| 1                | 6                | 0              | -2.477194               | -1.452625 | -0.233830 |
| 2                | 6                | 0              | -1.262673               | -0.686176 | -0.123682 |
| 3                | 6                | 0              | -0.021067               | -1.390827 | -0.266279 |
| 4                | 6                | 0              | -0.051319               | -2.797521 | -0.545258 |
| 5                | 6                | 0              | -1.286874               | -3.498303 | -0.684058 |
| 6                | 6                | 0              | -2.460513               | -2.851114 | -0.527586 |
| 7                | 6                | 0              | 1.257209                | -0.738612 | -0.133343 |
| 8                | 6                | 0              | 1.127413                | -3.527599 | -0.692836 |
| 9                | 1                | 0              | -1.256917               | -4.558480 | -0.916124 |
| 10               | 1                | 0              | -3.405626               | -3.375228 | -0.634704 |
| 11               | 6                | 0              | 2.343712                | -2.902528 | -0.543035 |
| 12               | 6                | 0              | 2.449968                | -1.528691 | -0.253866 |
| 13               | 1                | 0              | 1.069775                | -4.588430 | -0.917641 |
| 14               | 1                | 0              | 3.258465                | -3.478176 | -0.651269 |
| 15               | 6                | 0              | -2.343814               | 2.903204  | 0.539738  |
| 16               | 6                | 0              | -1.127542               | 3.528403  | 0.689254  |



|    |    |   |           |           |           |
|----|----|---|-----------|-----------|-----------|
| 17 | 6  | 0 | 0.051234  | 2.798062  | 0.543314  |
| 18 | 6  | 0 | 0.021104  | 1.391130  | 0.265568  |
| 19 | 6  | 0 | -1.257147 | 0.738851  | 0.132878  |
| 20 | 6  | 0 | -2.449971 | 1.528966  | 0.252556  |
| 21 | 1  | 0 | 1.256690  | 4.559238  | 0.913549  |
| 22 | 1  | 0 | -3.258589 | 3.479010  | 0.646953  |
| 23 | 1  | 0 | -1.069953 | 4.589504  | 0.912791  |
| 24 | 6  | 0 | 1.286741  | 3.498813  | 0.682629  |
| 25 | 6  | 0 | 1.262768  | 0.686273  | 0.124054  |
| 26 | 6  | 0 | 2.477295  | 1.452495  | 0.235661  |
| 27 | 6  | 0 | 2.460426  | 2.851197  | 0.528401  |
| 28 | 1  | 0 | 3.405508  | 3.375177  | 0.636337  |
| 29 | 15 | 0 | -4.031422 | -0.730264 | -0.034979 |
| 30 | 5  | 0 | -3.922818 | 1.077152  | 0.143688  |
| 31 | 6  | 0 | -5.458447 | -1.816557 | -0.091671 |
| 32 | 6  | 0 | -6.380807 | -1.687428 | -1.150541 |
| 33 | 6  | 0 | -5.671190 | -2.734899 | 0.959980  |
| 34 | 6  | 0 | -7.504952 | -2.509495 | -1.144344 |
| 35 | 6  | 0 | -6.809705 | -3.534637 | 0.911756  |
| 36 | 6  | 0 | -7.736440 | -3.436168 | -0.127471 |
| 37 | 1  | 0 | -8.221013 | -2.424274 | -1.957958 |
| 38 | 1  | 0 | -6.983661 | -4.249182 | 1.712532  |
| 39 | 6  | 0 | -5.200899 | 1.976875  | 0.152928  |
| 40 | 6  | 0 | -5.469616 | 2.815998  | -0.950627 |
| 41 | 6  | 0 | -6.121748 | 1.927332  | 1.217735  |
| 42 | 6  | 0 | -6.632523 | 3.583370  | -0.964803 |
| 43 | 6  | 0 | -7.266383 | 2.722152  | 1.176948  |
| 44 | 6  | 0 | -7.539752 | 3.558079  | 0.095240  |
| 45 | 1  | 0 | -6.838339 | 4.217060  | -1.825178 |
| 46 | 1  | 0 | -7.966345 | 2.685154  | 2.009175  |
| 47 | 6  | 0 | -5.895523 | 1.015894  | 2.402012  |
| 48 | 1  | 0 | -6.535571 | 1.298421  | 3.241470  |
| 49 | 1  | 0 | -6.133683 | -0.025304 | 2.146425  |
| 50 | 1  | 0 | -4.856319 | 1.044461  | 2.747305  |
| 51 | 6  | 0 | -8.769744 | 4.427490  | 0.079135  |
| 52 | 1  | 0 | -8.549001 | 5.417835  | 0.492435  |
| 53 | 1  | 0 | -9.140250 | 4.571854  | -0.939156 |
| 54 | 1  | 0 | -9.572501 | 3.991391  | 0.679068  |
| 55 | 6  | 0 | -4.525509 | 2.874222  | -2.130398 |
| 56 | 1  | 0 | -3.600924 | 3.407994  | -1.883085 |
| 57 | 1  | 0 | -4.234362 | 1.871242  | -2.465088 |
| 58 | 1  | 0 | -4.989192 | 3.388131  | -2.975766 |
| 59 | 6  | 0 | -6.186418 | -0.689246 | -2.263877 |
| 60 | 1  | 0 | -5.199654 | -0.791557 | -2.728546 |

|     |    |   |           |           |           |
|-----|----|---|-----------|-----------|-----------|
| 61  | 1  | 0 | -6.941503 | -0.828726 | -3.040150 |
| 62  | 1  | 0 | -6.275611 | 0.337413  | -1.888684 |
| 63  | 6  | 0 | -4.716020 | -2.862504 | 2.120984  |
| 64  | 1  | 0 | -4.530800 | -1.890984 | 2.593020  |
| 65  | 1  | 0 | -5.124310 | -3.533551 | 2.879171  |
| 66  | 1  | 0 | -3.744690 | -3.262242 | 1.809030  |
| 67  | 6  | 0 | -8.977129 | -4.288167 | -0.133561 |
| 68  | 1  | 0 | -9.797297 | -3.769488 | 0.374803  |
| 69  | 1  | 0 | -9.305052 | -4.504003 | -1.153300 |
| 70  | 1  | 0 | -8.812001 | -5.235108 | 0.385855  |
| 71  | 5  | 0 | 3.922830  | -1.077361 | -0.143610 |
| 72  | 15 | 0 | 4.031745  | 0.729455  | 0.041088  |
| 73  | 6  | 0 | 5.458641  | 1.816106  | 0.095538  |
| 74  | 6  | 0 | 6.385732  | 1.682617  | 1.149909  |
| 75  | 6  | 0 | 5.671118  | 2.732733  | -0.957581 |
| 76  | 6  | 0 | 7.513680  | 2.499157  | 1.138064  |
| 77  | 6  | 0 | 6.813616  | 3.527330  | -0.914786 |
| 78  | 6  | 0 | 7.741804  | 3.428824  | 0.122971  |
| 79  | 1  | 0 | 8.236815  | 2.405534  | 1.944490  |
| 80  | 1  | 0 | 6.990695  | 4.235804  | -1.720207 |
| 81  | 6  | 0 | 5.200793  | -1.977289 | -0.154663 |
| 82  | 6  | 0 | 5.469634  | -2.818467 | 0.947308  |
| 83  | 6  | 0 | 6.121587  | -1.925648 | -1.219384 |
| 84  | 6  | 0 | 6.632556  | -3.585825 | 0.959947  |
| 85  | 6  | 0 | 7.266321  | -2.720430 | -1.180149 |
| 86  | 6  | 0 | 7.539768  | -3.558419 | -0.100076 |
| 87  | 1  | 0 | 6.838460  | -4.221132 | 1.819106  |
| 88  | 1  | 0 | 7.966312  | -2.681647 | -2.012266 |
| 89  | 6  | 0 | 4.525914  | -2.878369 | 2.127280  |
| 90  | 1  | 0 | 4.237556  | -1.875721 | 2.465414  |
| 91  | 1  | 0 | 3.599823  | -3.408892 | 1.878649  |
| 92  | 1  | 0 | 4.988680  | -3.396243 | 2.970722  |
| 93  | 6  | 0 | 8.769855  | -4.427724 | -0.085698 |
| 94  | 1  | 0 | 9.139789  | -4.574914 | 0.932394  |
| 95  | 1  | 0 | 8.549475  | -5.416919 | -0.501937 |
| 96  | 1  | 0 | 9.572895  | -3.989822 | -0.683937 |
| 97  | 6  | 0 | 5.895348  | -1.011812 | -2.401801 |
| 98  | 1  | 0 | 6.134828  | 0.028644  | -2.144440 |
| 99  | 1  | 0 | 6.534472  | -1.293388 | -3.242278 |
| 100 | 1  | 0 | 4.855842  | -1.038749 | -2.746337 |
| 101 | 6  | 0 | 4.715410  | 2.859117  | -2.118261 |
| 102 | 1  | 0 | 5.124105  | 3.528082  | -2.878069 |
| 103 | 1  | 0 | 4.528170  | 1.886974  | -2.588210 |
| 104 | 1  | 0 | 3.745013  | 3.261090  | -1.806315 |

|     |   |   |          |           |           |
|-----|---|---|----------|-----------|-----------|
| 105 | 6 | 0 | 6.195656 | 0.680813  | 2.260770  |
| 106 | 1 | 0 | 6.952815 | 0.818893  | 3.035275  |
| 107 | 1 | 0 | 5.210199 | 0.781167  | 2.728612  |
| 108 | 1 | 0 | 6.284533 | -0.344783 | 1.882627  |
| 109 | 6 | 0 | 8.955143 | 4.318693  | 0.156993  |
| 110 | 1 | 0 | 8.751722 | 5.218830  | 0.747400  |
| 111 | 1 | 0 | 9.806771 | 3.809712  | 0.615020  |
| 112 | 1 | 0 | 9.241712 | 4.638800  | -0.847503 |

-----
